# Supplementary material for: A short-oligonucleotide microarray that allows improved detection of gastrointestinal tract microbial communities
Source: PubMed Central journal article supplement (PMC2628385; doi:10.1186/1471-2180-8-195), 2008-11-11
Supplement: 1471-2180-8-195-S1.pdf [file 1471-2180-8-195-S1.pdf]

**Additional file 1** - Target organisms for 50-mer probes and actual tested microarray specificity using optimised hybridisation and washing conditions

| Probe name <sup>a</sup> | Full name <sup>a</sup> | Target organism(s) <sup>b</sup>                                                                                                                                                                                                                                             | Sequence (5'-3')                                        | Hybridisation with pure culture <sup>c</sup> | Actual specificity |
|-------------------------|------------------------|-----------------------------------------------------------------------------------------------------------------------------------------------------------------------------------------------------------------------------------------------------------------------------|---------------------------------------------------------|----------------------------------------------|--------------------|
| BANG1240                | S-G-Bact-1240-a-S-50   | <i>Bifidobacterium angulatum</i> ,<br><i>B. minimum</i> , <i>B. scardovii</i> ,<br><i>B. pullorum</i> , <i>B. merycicum</i> ,<br><i>B. gallinarum</i> , <i>B. indicum</i> ,<br><i>B. catenulatum</i> , <i>B. coryneforme</i> ,<br><i>B. saeculare</i> and <i>B. subtile</i> | GCTACAATGGCCGGTACAACGGGAT<br>GCGACATGGCGACATGGAGCGGATC  | FP                                           | Non-specific       |
| BPSE1438                | S-S-Bact-1438-a-S-50   | <i>Bifidobacterium pseudocatenulatum</i>                                                                                                                                                                                                                                    | CCGAAGCCGGTGGCCTAACCCCTTTGT<br>GGATGGAGCCGTCTAAGGTGAGAC | FP                                           | Genus              |
| BINF166                 | S-S-Bact-0166-a-S-50   | <i>Bifidobacterium infantis</i> ,<br><i>B. longum</i> and <i>B. suis</i>                                                                                                                                                                                                    | GGTGGTAATGCCGGATGTTCCAGTTG<br>ATCGCATGGTCTTCTGGGAAACGT  | +                                            | Species            |
| BLON85                  | S-G-Bact-0085-a-S-50   | <i>Bifidobacterium longum</i> ,<br><i>B. infantis</i> , <i>B. suis</i> , <i>B. bifidum</i> and <i>B. breve</i>                                                                                                                                                              | CTTGCTTGGTGGTGAGAGTGGCGAAC<br>GGGTGAGTAATGCGTGACCGACCT  | FP                                           | Genus              |
| BADO198                 | S-S-Bact-0198-a-S-50   | <i>Bifidobacterium adolescentis</i> and <i>B. ruminantium</i>                                                                                                                                                                                                               | GCATGTCCTTCTGGGAAAGATTCTAT<br>CGGTATGGGATGGGGTCGCGTCCT  | FP                                           | Non-specific       |
| BFRA702                 | S-G-Bact-0702-a-S-50   | <i>Bacteroides fragilis</i> ,<br><i>B. thetaiotaomicron</i> and <i>B. acidifaciens</i>                                                                                                                                                                                      | TGCTTAGATATCACGAAGAACTCCGA<br>TTGCGAAGGCAGCTCACTGGACTG  | +                                            | Species            |

| Probe name | Full name <sup>a</sup> | Target organism(s) <sup>b</sup>                                                                                                                                                                                                              | Sequence (5'-3')                                        | Hybridisation with pure culture <sup>c</sup> | Actual specificity  |
|------------|------------------------|----------------------------------------------------------------------------------------------------------------------------------------------------------------------------------------------------------------------------------------------|---------------------------------------------------------|----------------------------------------------|---------------------|
| BFRA583    | S-S-Bact-0583-a-S-50   | <i>Bacteroides fragilis</i>                                                                                                                                                                                                                  | AGCGTAGGTGGACTGGTAAGTCAGT<br>TGTGAAAGTTTGCGGCTCAACCGTA  | +                                            | Species             |
| BVUL1146   | S-S-Bact-1146-a-S-50   | <i>Bacteroides vulgatus</i>                                                                                                                                                                                                                  | TATGCTGAGGACTCTGACAAGACTGC<br>CATCGTAAGATGTGAGGAAGGTGG  | FP                                           | Genus               |
| BROI398    | S-G-Bact-0398-a-S-50   | <i>Bacteroides acidifaciens</i> ,<br><i>B. thetaiotaomicron</i> , <i>B. eggerthii</i> ,<br><i>B. fragilis</i> , <i>B. caccae</i> , <i>B. vulgatus</i> ,<br><i>B. uniformis</i> , <i>B. stercoris</i> and<br><i>Prevotella heparinolytica</i> | ACCAGCCAAGTAGCGTGAAGGATGA<br>CTGCCCTATGGGTTGTAAACTTCTT  | -                                            | No signal generated |
| CLEP575    | S-S-Bact-0575-a-S-50   | <i>Clostridium leptum</i>                                                                                                                                                                                                                    | GGGTGTAAAGGGTGCCTAGGCGGCG<br>AGGCAAGTCAGGCGTGAAATCTATG  | +                                            | Species             |
| CLEP725    | S-S-Bact-0725-a-S-50   | <i>Clostridium leptum</i>                                                                                                                                                                                                                    | CTTTAACTGACGCTGAAGCACGAAA<br>GCATGGGTAGCAAACAGGATTAGAT  | +                                            | Species             |
| EFAEC712   | S-F-Bact-0712-a-S-50   | Enterococcaceae                                                                                                                                                                                                                              | GTGAAATGCGTAGATATATGGAGGA<br>ACACCAGTGGCGAAGGCCGGCTCTCT | FP                                           | Order               |
| EFAE647    | S-C-Bact-0647-a-S-50   | Mostly Enterococcaceae                                                                                                                                                                                                                       | GGGAGGGTCATTGGAACTGGGAGA<br>CTTGAGTGCAGAAGAGGAGAGTGGA   | +                                            | Family              |
| LACT704    | S-G-Bact-0704-a-S-50   | Lactobacilli                                                                                                                                                                                                                                 | GTGGAATGCGTAGATATATGGAAGA<br>ACACCAGTGGCGAAGGCCGGCTCTCT | FP                                           | Order               |
| LACT812    | S-G-Bact-0812-a-S-50   | Lactobacilli                                                                                                                                                                                                                                 | GGTAGTCCATGCCGTAAACGATGAG<br>TGCTAAGTGTTGGGAGGTTTCCGCC  | FP                                           | Order               |

| Probe name | Full name <sup>a</sup> | Target organism(s) <sup>b</sup>                            | Sequence (5'-3')                                       | Hybridisation with pure culture <sup>c</sup> | Actual specificity                          |
|------------|------------------------|------------------------------------------------------------|--------------------------------------------------------|----------------------------------------------|---------------------------------------------|
| LJOHN71    | S-S-Bact-0071-a-S-50   | <i>Lactobacillus johnsonii</i>                             | GCACTAAATGAAACTAGATACAAGC<br>GAGCGGCGGACGGGTGAGTAACACG | FP                                           | Non-specific                                |
| STRE797    | S-P-Bact-0797-a-S-50   | Most streptococci and some other members of the Firmicutes | AGGATTAGATACCCTGGTAGTCCACG<br>CCGTAAACGATGAGTGCTAGGTGT | +                                            | Order                                       |
| STRE1475   | S-O-Bact-1475-a-S-50   | Most streptococci and some <i>Enterococcus</i> spp.        | GCCGCCTAAGGTGGGATAGATGATT<br>GGGGTGAAGTCGTAACAAGGTAGCC | +                                            | Order                                       |
| ENTE1004   | S-F-Bact-1004-a-S-50   | Enterobacteriaceae and <i>Shewanella putrefaciens</i>      | AACTTCCAGAGATGGATTGGTGCCT<br>TCGGGAACGTGAGACAGGTGCTG   | +                                            | Family                                      |
| ECOL83     | S-F-Bact-0083-a-S-50   | <i>Escherichia coli</i> and <i>Salmonella</i> spp.         | CTTGCTCTTTGCTGACGAGTGGCGGA<br>CGGGTGAGTAATGTCTGGGAACT  | +                                            | Family                                      |
| ECOLI83    | S-F-Bact-0083-a-S-50   | <i>Escherichia coli</i> and <i>Shigella boydii</i>         | CTTGCTTCTTTGCTGACGAGTGGCGG<br>ACGGGTGAGTAATGTCTGGGAAAC | +                                            | Family                                      |
| SALM1123   | S-G-Bact-1123-a-S-50   | <i>Salmonella</i> spp.                                     | TGTTGCCAGCGATTAGGTCCGGAACT<br>CAAAGGAGACTGCCAGTGATAAAC | N/T                                          | No <i>E. coli</i> 16S ribosomal DNA binding |
| SALM809    | S-F-Bact-0809-a-S-50   | <i>Salmonella</i> spp. and <i>Enterobacter agglomerans</i> | GCCGTAAACGATGTCTACTTGGAGGT<br>TGTGCCCTTGAGGCGTGGCTTCCG | N/T                                          | No <i>E. coli</i> 16S ribosomal DNA binding |

| Probe name | Full name <sup>a</sup>                                                       | Target organism(s) <sup>b</sup>                          | Sequence (5'-3')                                        | Hybridisation with pure culture <sup>c</sup> | Actual specificity                             |
|------------|------------------------------------------------------------------------------|----------------------------------------------------------|---------------------------------------------------------|----------------------------------------------|------------------------------------------------|
| SHIG83     | S-F-Bact-0083-a-S-50                                                         | <i>Shigella</i> spp. and <i>Escherichia coli</i>         | CTTGCTGTTTCGCTGACGAGTGCGG<br>ACGGGTGAGTAATGTCTGGGAAAC   | +                                            | Family                                         |
| ROB810     | S-S-Bact-0810-a-S-50                                                         | <i>Ruminococcus obeum</i>                                | CTGGTAGTCCACGCCGTAAACGATG<br>ATTACTAGGTGTTGGGGAGCAAAGC  | +                                            | Species                                        |
| POSd1055   | S-*-Bact-1055-a-S-50                                                         | Most bacteria                                            | ATGGYYGTCGTCAGCTCGTGCCGTGA<br>GGTGTGCTTAAGTGCCATAACGA   | +                                            | Domain bacteria                                |
| POSe1055   | S-*-Bact-1055-a-S-50                                                         | Most bacteria                                            | ATGGYYGTCGTCAGCTCGTGTGCGTGA<br>GATGTGCTTAAGTCCYCAACGA   | +                                            | Domain bacteria                                |
| POSf1055   | S-*-Bact-1055-a-S-50                                                         | Most bacteria                                            | ATGGYYGTCGTCAGCTCGTGTGCGTGA<br>AATGTGCTTAAGTCCCAGCAACGA | +                                            | Domain bacteria                                |
| TMAR162    | S-G-Bact-0162-a-S-50                                                         | <i>Thermotoga maritima</i> and<br><i>T. neapolitana</i>  | GGGAAACCCTGGTTAATACCCCATAC<br>GCTCCATCAACGCAAGTTGGTGGA  | -                                            | No signal from any<br>labelled DNA<br>recorded |
| SCER0646   | S-G-Euk-S.cere-<br>0646( <i>S. cerevisiae</i><br>strain CICC1308)-a-S-<br>50 | <i>Saccharomyces cerevisiae</i> and<br><i>S. bayanus</i> | CCTTTCCTTCTGGCTAACCTTGAGTC<br>CTTGTGGCTCTTGGCGAACCGGGA  | -                                            | No signal from any<br>labelled DNA<br>recorded |

<sup>a</sup> Nomenclature of the oligonucleotide probe according to Alm et al. [57].

<sup>b</sup> Target organism(s) of the probe from the BLASTn prediction [17].

<sup>c</sup> Hybridisation with pure culture results: +, positive hybridisation; -, no hybridisation; NT, not tested; FP, false positive.
