# Supplementary material for: A short-oligonucleotide microarray that allows improved detection of gastrointestinal tract microbial communities
Source: PubMed Central journal article supplement (PMC2628385; doi:10.1186/1471-2180-8-195), 2008-11-11
Supplement: 1471-2180-8-195-S2.pdf [file 1471-2180-8-195-S2.pdf]

**Additional file 2** - Target organisms for 40-mer probes and actual tested microarray specificity using optimum hybridisation and washing conditions

| Probe name | Full name <sup>a</sup> | Target organism(s) <sup>b</sup>                      | Sequence (5'-3')                             | Hybridisation with pure culture <sup>c</sup> | Actual specificity |
|------------|------------------------|------------------------------------------------------|----------------------------------------------|----------------------------------------------|--------------------|
| BINF177    | S-St-Bact-0177-a-S-40  | <i>Bifidobacterium infantis</i>                      | CGGATGTTCCAGTTGATCGCAT<br>GGTCTTCTGGGAAACGTT | +                                            | Species            |
| BLON451    | S-S-Bact-0451-a-S-40   | <i>Bifidobacterium longum</i> and <i>B. infantis</i> | GGAGCAAGCGAGAGTGAGTTT<br>ACCCGTTGAATAAGCACCG | +                                            | Species            |
| BPSE996    | S-S-Bact-0996-a-S-40   | <i>Bifidobacterium pseudocatenulatum</i>             | TTGACATGTTCCCGACAGCCGT<br>AGAGATATGGCTCCTTC  | NT                                           | No signal          |
| BFRA400    | S-G-Bact-0400-a-S-40   | <i>Bacteroides fragilis</i> and <i>B. ovatus</i>     | CAAGTAGCGTGAAGGATGAAG<br>GCTCTATGGGTCGTAAACT | +                                            | Species            |
| BFRA561    | S-S-Bact-0561-a-S-40   | <i>Bacteroides fragilis</i>                          | CGGATTTATTGGGTTTAAAGGG<br>AGCGTAGGTGGACTGGTA | +                                            | Species            |
| BVUL1144   | S-St-Bact-1144-a-S-40  | <i>Bacteroides vulgatus</i>                          | GGTTATGCTGAGGACTCTGACA<br>AGACTGCCATCGTAAGAT | FP                                           | Genus              |
| BVUL588    | S-S-Bact-0588-a-S-40   | <i>Bacteroides vulgatus</i>                          | GCGTAGATGGATGTTTAAGTCA<br>GTTGTGAAAGTTTGCGGC | FP                                           | Genus              |
| CLEP647    | S-S-Bact-0647-a-S-40   | <i>Clostridium leptum</i>                            | TGAAACTGTCTTGCTTGAGTGA<br>AGTAGAGGTAGGCGGAAT | +                                            | Species            |
| CLEP765    | S-S-Bact-0765-a-S-40   | <i>Clostridium leptum</i>                            | CTGAAGCACGAAAGCATGGGT<br>AGCAAACAGGATTAGATAC | +                                            | Species            |

| Probe name | Full name <sup>a</sup> | Target organism(s) <sup>b</sup>                                                                                                                                                                                                                                                                                      | Sequence (5'-3')                             | Hybridisation with pure culture <sup>c</sup> | Actual specificity  |
|------------|------------------------|----------------------------------------------------------------------------------------------------------------------------------------------------------------------------------------------------------------------------------------------------------------------------------------------------------------------|----------------------------------------------|----------------------------------------------|---------------------|
| EFAE486    | S-G-Bact-0486-a-S-40   | <i>Enterococcus faecium</i> , <i>E. durans</i> ,<br><i>E. hirae</i> , <i>E. faecalis</i> , <i>E. villorum</i> ,<br><i>E. ratti</i> and <i>E. azikeevi</i>                                                                                                                                                            | AACTGTTCATCCCTTGACGGTA<br>TCTAACCAGAAAGCCACG | FP                                           | Order               |
| FIRM712    | S-P-Bact-0712-a-S-40   | Firmicutes phyla                                                                                                                                                                                                                                                                                                     | GTGAAATGCGTAGATATATGG<br>AGGAACACCAGTGGCGAAG | +                                            | Phylum              |
| LCRI140    | S-G-Bact-0140-a-S-40   | <i>Lactobacillus crispatus</i> , <i>L. acidophilus</i> , <i>L. helveticus</i> and <i>L. jensenii</i>                                                                                                                                                                                                                 | CATAGTCTGGGATACCACTTGG<br>AAACAGGTGCTAATACCG | NT                                           | No signal generated |
| LCRI432    | S-G-Bact-0432-a-S-40   | <i>Lactobacillus crispatus</i> , <i>L. acidophilus</i> , <i>L. helveticus</i> , <i>L. delbrueckii</i> , <i>L. suntoryeus</i> , <i>L. intestinalis</i> , <i>L. hamsteri</i> , <i>L. kitasatonis</i> , <i>L. psittaci</i> , <i>L. lactis</i> , <i>L. amylolyticus</i> ,<br><i>L. gallinarum</i> and <i>L. jensenii</i> | TTCGGATCGTAAAGCTCTGTTG<br>TTGGTGAAGAAGGATAGA | NT                                           | No signal generated |
| LJOHN208   | S-S-Bact-0208-a-S-40   | <i>Lactobacillus johnsonii</i>                                                                                                                                                                                                                                                                                       | TTTGAAAGATGGTTCTGCTATC<br>ACTCTTGGATGGACCTGC | FP                                           | Non-specific        |
| LJOHN74    | S-S-Bact-0074-a-S-40   | <i>Lactobacillus johnsonii</i>                                                                                                                                                                                                                                                                                       | CTAAATGAAACTAGATACAAG<br>CGAGCGGCGGACGGGTGAG | FP                                           | Non-specific        |
| SBOV87     | S-St-Bact-0087-a-S-40  | <i>Streptococcus bovis</i>                                                                                                                                                                                                                                                                                           | CTTGCTAAAGTTGGAAGAGTGT<br>GCGAACGGGTGAGTAACG | N/T                                          | No signal generated |
| SBOV992    | S-G-Bact-0992-a-S-40   | <i>Streptococcus bovis</i> and <i>S. luteciae</i>                                                                                                                                                                                                                                                                    | CCTTACCAGGTCTTGACATCCC<br>GATGCTATTCCTAGAGAT | N/T                                          | No signal generated |

| Probe name | Full name <sup>a</sup> | Target organism(s) <sup>b</sup>                         | Sequence (5'-3')                             | Hybridisation with pure culture <sup>c</sup> | Actual specificity  |
|------------|------------------------|---------------------------------------------------------|----------------------------------------------|----------------------------------------------|---------------------|
| GAMA785    | S-C-Bact-0785-a-S-40   | Gammaproteobacteria                                     | GGATTAGATACCCTGGTAGTCC<br>ACGCTGTAAACGATGTCC | +                                            | Class               |
| PROT1134   | S-P-Bact-1134-a-S-40   | Proteobacteria                                          | ATTAGGTCGGGAACTCAAAGG<br>AGACTGCCAGTGATAAACT | +                                            | Phylum              |
| ECOL84     | S-F-Bact-0084-a-S-40   | <i>Escherichia coli</i> and <i>Salmonella</i> spp.      | TTGCTCTTTGCTGACGAGTGGC<br>GGACGGGTGAGTAATGTC | +                                            | Family              |
| ECOLI119   | S-S-Bact-0119-a-S-40   | <i>Escherichia coli</i> O157:H7 EDL933                  | AATGTCTGGGAACTGCCTGAT<br>GGAGAGGGATAACTACTG  | N/T                                          | No signal generated |
| SFLE465    | S-St-Bact-0465-a-S-40  | <i>Shigella flexneri</i>                                | AATACCTTTACTCATTGACGTT<br>ACCCGCAGAAGAAGCACC | FP                                           | Family              |
| STYP971    | S-G-Bact-0971-a-S-40   | <i>Salmonella</i> Typhimurium and <i>S. enteritidis</i> | GCGAAGAACCTTACCTGGTCTT<br>GACATCCACAGAAGAATC | FP                                           | Family              |
| ROB592     | S-S-Bact-0592-a-S-38   | <i>Ruminococcus obeum</i>                               | GCGTAGACGGACTGGCAAGTC<br>TGATGTGAAAGGCGGGG   | +                                            | Species             |
| POSa1055   | S*-Bact-1055-a-S-40    | Most bacteria                                           | ATGGYYGTCGTCAGCTCGTGCC<br>GTGAGGTGTYGGCTTAAG | +                                            | Domain<br>bacteria  |
| POSB1055   | S*-Bact-1055-a-S-40    | Most bacteria                                           | ATGGYYGTCGTCAGCTCGTGTC<br>GTGAGATGTYGGGTTAAG | +                                            | Domain<br>bacteria  |
| POSc1055   | S*-Bact-1055-a-S-40    | Most bacteria                                           | ATGGYYGTCGTCAGCTCGTGTT<br>GTGAAATGTYGGGTTAAG | +                                            | Domain<br>bacteria  |

| Probe name | Full name <sup>a</sup>                                | Target organism(s) <sup>b</sup>                       | Sequence (5'-3')                             | Hybridisation with pure culture <sup>c</sup> | Actual specificity                       |
|------------|-------------------------------------------------------|-------------------------------------------------------|----------------------------------------------|----------------------------------------------|------------------------------------------|
| SCER1291   | S-P-Euk-S.cere-1291(S. cerevisiae isolate WI1)-a-S-40 | <i>Saccharomyces cerevisiae</i> and <i>S. bayanus</i> | TGGTGGAGTGATTTGTCTGCTT<br>AATTGCGATAACGAACGA | -                                            | No signal from any labelled DNA recorded |
| TMAR164    | S-St-Bact-0164-a-S-40                                 | <i>Thermotoga maritima</i>                            | GAAACCCTGGTTAATACCCCAT<br>ACGCTCCATCAACGCAAG | -                                            | No signal from any labelled DNA recorded |

<sup>a</sup> Nomenclature of the oligonucleotide probe according to Alm *et al.* [57].

<sup>b</sup> Target organism(s) of the probe from the BLASTn prediction [17].

<sup>c</sup> Hybridisation with pure culture results: +, positive hybridisation; -, no hybridisation; NT, not tested; FP, false positive
