# Supplementary material for: A short-oligonucleotide microarray that allows improved detection of gastrointestinal tract microbial communities
Source: PubMed Central journal article supplement (PMC2628385; doi:10.1186/1471-2180-8-195), 2008-11-11
Supplement: 1471-2180-8-195-S3.pdf [file 1471-2180-8-195-S3.pdf]

**Additional file 3.** Target organisms for 16-21-mer probes and actual tested microarray specificity.

| Probe name                                | Full name <sup>a</sup> | Target organism(s)                                                                                           | Sequence (5'-3')      | Predicted probe specificity <sup>m</sup>                                                                                                                                                                                                      | Hybridisation with pure culture <sup>n</sup>                                                                                                  | Actual specificity                                                                              |
|-------------------------------------------|------------------------|--------------------------------------------------------------------------------------------------------------|-----------------------|-----------------------------------------------------------------------------------------------------------------------------------------------------------------------------------------------------------------------------------------------|-----------------------------------------------------------------------------------------------------------------------------------------------|-------------------------------------------------------------------------------------------------|
| Bacteroides                               | S-G-Bact-0400-a-S-19   | <i>Bacteroides fragilis</i>                                                                                  | CAAGTAGCGTGAAGGATGA   | <i>Bacteroides caecae</i> , <i>B. eggerthii</i> ,<br><i>B. fragilis</i> , <i>B. merdae</i> , <i>B. ovatus</i> ,<br><i>B. thetaiotaomicron</i> , <i>B. uniformis</i> ,<br><i>B. vulgatus</i> and <i>B. stercoris</i> .                         | +                                                                                                                                             | Genus                                                                                           |
| <i>B. fragilis</i> grp <sup>b</sup>       | S-G-Bact-0631-a-S-20   | <i>Bacteroides fragilis</i>                                                                                  | TAAAATTGCAGTTGATACTG  | <i>Bacteroides fragilis</i> group                                                                                                                                                                                                             | +                                                                                                                                             | Species                                                                                         |
| <i>B. longum</i> grp2 <sup>b</sup>        | S-S-Bact-0631-a-S-21   | <i>Bacteroides fragilis</i>                                                                                  | TAAAATTGCAGTTGATACTGT | <i>Bacteroides fragilis</i> ,<br><i>B. thetaiotaomicron</i> , <i>B. stercoris</i> ,<br><i>B. vulgatus</i> , <i>B. caecae</i> , <i>B. uniformis</i> ,<br><i>B. eggerthii</i> , <i>Prevotella zoogloformans</i><br>and <i>P. heparinolytica</i> | FP<br>No Bacteroides<br>species bound, but<br>highly specific for<br><i>Bifidobacterium</i><br><i>longum</i> and <i>B.</i><br><i>infantis</i> | Species - The<br><i>Bifidobacterium</i><br><i>longum</i> and <i>B.</i><br><i>infantis</i> group |
| <i>B. distasonis</i> 1 <sup>c</sup>       | S-G-Bact-0165-a-S-18   | Bifidobacteria                                                                                               | GGGTGGTAATGCCGGATG    | Specificity to a wide range of<br>bifidobacteria                                                                                                                                                                                              | FP                                                                                                                                            | Species<br><i>Bacteroides</i><br><i>distasonis</i>                                              |
| <i>B. distasonis</i> 2                    | S-S-Bact-0750-a-S-18   | <i>Bacteroides distasonis</i>                                                                                | TGCCAAGCCATTACTGAC    | <i>Bacteroides distasonis</i>                                                                                                                                                                                                                 | FP<br><i>Bacteroides fragilis</i>                                                                                                             | Genus                                                                                           |
| BLONG185                                  | S-S-Bact-0185-a-S-18   | <i>Bifidobacterium</i><br><i>longum</i> , <i>B. breve</i> and <i>B.</i><br><i>longum</i> bv. <i>Infantis</i> | TTCCAGTTGATCGCATGGT   | <i>Bifidobacterium longum</i> , <i>B. breve</i> and <i>B.</i><br><i>longum</i> bv. <i>Infantis</i>                                                                                                                                            | FP                                                                                                                                            | Non-specific                                                                                    |
| <i>B. longum</i> grp<br>& <i>B. breve</i> | S-G-Bact-0277-a-S-18   | <i>Bifidobacterium</i><br><i>longum</i> , <i>B. breve</i> and <i>B.</i><br><i>longum</i> bv. <i>Infantis</i> | CGACGATCCCAGAGATGG    | <i>Bifidobacterium longum</i> and<br><i>B. longum</i> bv. <i>Infantis</i>                                                                                                                                                                     | +                                                                                                                                             | Species                                                                                         |

| Probe name                                           | Full name <sup>a</sup> | Target organism(s)                                                    | Sequence (5'-3')      | Predicted probe specificity                                                                                                                      | Hybridisation with pure culture | Actual specificity                                                                |
|------------------------------------------------------|------------------------|-----------------------------------------------------------------------|-----------------------|--------------------------------------------------------------------------------------------------------------------------------------------------|---------------------------------|-----------------------------------------------------------------------------------|
| <i>B. longum</i><br>grp3 <sup>d</sup>                | S-G-Bact-0445-a-S-18   | <i>Bifidobacterium longum</i><br>and <i>B. infantis</i>               | TATCGGGGAGCAAGCGAG    | <i>Bifidobacterium longum</i> , <i>B. infantis</i> ,<br><i>B. pullorum</i> , <i>B. gallinarum</i> ,<br><i>B. saeculare</i> and <i>B. subtile</i> | +                               | Species                                                                           |
| <i>B. pseud</i> &<br><i>catenulatum</i> <sup>b</sup> | S-G-Bact-0177-a-S-16   | <i>Bifidobacterium</i><br><i>pseudocatenulatum</i>                    | CGGATGCTCCGACTCC      | <i>Bifidobacterium catenulatum</i> group and<br><i>B. thermacidophilum</i>                                                                       | +                               | Species                                                                           |
| <i>B.</i><br><i>adolescentis</i> <sup>e</sup>        | S-G-Bact-0211-a-S-21   | <i>Bifidobacterium</i><br><i>adolescentis</i>                         | GGAAAGATTCTATCGGTATGG | <i>Bifidobacterium adolescentis</i> and<br><i>B. ruminantium</i>                                                                                 | +                               | Species                                                                           |
| <i>B. angulatum</i> <sup>b</sup>                     | S-S-Bact-0186-a-S-18   | <i>Bifidobacterium</i><br><i>angulatum</i>                            | CAGTCCATCGCATGGTGG    | <i>Bifidobacterium angulatum</i>                                                                                                                 | +                               | Species                                                                           |
| <i>B. bifidum</i> <sup>b</sup>                       | S-G-Bact-0186-a-S-21   | <i>Bifidobacterium</i><br><i>bifidum</i>                              | CCACATGATCGCATGTGATTG | <i>Bifidobacterium bifidum</i> and<br><i>B. cuniculi</i>                                                                                         | +                               | Genus,<br><i>Bifidobacterium</i><br><i>bifidum</i> and <i>B.</i><br><i>longum</i> |
| <i>B. longum</i><br>grp1 <sup>b</sup>                | S-S-Bact-1006-a-S-18   | <i>Bifidobacterium longum</i><br>and <i>B. longum</i> bv.<br>Infantis | GTTCCCGACGGTCGTAGA    | <i>Bifidobacterium longum</i> ,<br><i>B. pseudolongum</i> and<br><i>B. longum</i> bv. Infantis                                                   | +                               | Species                                                                           |
| Enterobacteriaceae <sup>l</sup>                      | S-F-Bact-0183-a-S-18   | Enterobacteriaceae                                                    | CGTCGCAAGACCAAAGAG    | <i>Escherichia coli</i> and <i>Salmonella</i><br>Typhimurium                                                                                     | +                               | Family                                                                            |

| Probe name                       | Full name <sup>a</sup> | Target organism(s)             | Sequence (5'-3')            | Predicted probe specificity                                                                                                       | Hybridisation with pure culture | Actual specificity                                                                            |
|----------------------------------|------------------------|--------------------------------|-----------------------------|-----------------------------------------------------------------------------------------------------------------------------------|---------------------------------|-----------------------------------------------------------------------------------------------|
| Firmicutes1 <sup>f</sup>         | S-P-Bact-0366-a-S-18   | Firmicutes – probe 1           | GCAGTAGGGAATCTTCCG          | Too many 16S ribosomal gene target matches to define full probe specificity using BLASTn                                          | +                               | Genus -<br><i>Lactobacillus acidophilus</i> ,<br><i>L. gasseri</i> and<br><i>L. johnsonii</i> |
| Firmicutes2 <sup>f</sup>         | S-P-Bact-0366-a-S-18   | Firmicutes – probe 2           | GCAGTAGGGAATCTTCGG          | Too many 16S ribosomal gene target matches to define full probe specificity using BLASTn                                          | +                               | Genus -<br><i>Enterococcus faecium</i>                                                        |
| Firmicutes3 <sup>f</sup>         | S-P-Bact-0366-a-S-18   | Firmicutes – probe 3           | GCAGTAGGGAATCTTCCA          | Too many 16S ribosomal gene target matches to define full probe specificity using BLASTn                                          | +                               | Genus -<br><i>Lactobacillus acidophilus</i> , <i>L. gasseri</i> and <i>L. johnsonii</i>       |
| <i>L. johnsonii</i> <sup>g</sup> | S-S-Bact-0052-a-S-23   | <i>Lactobacillus johnsonii</i> | GATGATTTTAGTTCTTGCACTA<br>A | <i>Lactobacillus johnsonii</i>                                                                                                    | -                               | N/A                                                                                           |
| <i>L. casei</i> <sup>h</sup>     | S-S-Bact-0092-a-S-20   | <i>Lactobacillus casei</i>     | TGCACTGAGATTCGACTTAA        | <i>Lactobacillus casei</i>                                                                                                        | -                               | N/A                                                                                           |
| <i>Enterococcus</i><br>genus     | S-G-Bact-1262-a-S-16   | <i>Enterococcus faecium</i>    | AGTCGCGAGGCTAAGC            | Specificity to a wide range of the<br><i>Enterococcus</i> genus                                                                   | +                               | <i>Enterococcus faecium</i>                                                                   |
| <i>E. faecium</i>                | S-G-Bact-0097-a-S-18   | <i>Enterococcus faecium</i>    | CGGAAAAAGAGGAGTGGC          | <i>Enterococcus faecium</i> , <i>E. canis</i> ,<br><i>E. hirae</i> , <i>E. villorum</i> , <i>E. azikeevi</i> and <i>E. durans</i> | +                               | <i>Enterococcus faecium</i>                                                                   |
| <i>R. obeum</i> <sup>i</sup>     | S-S-Bact-1455-a-S-20   | <i>Ruminococcus obeum</i>      | ACCTAACTGCAAAGAAGGAG        | <i>Ruminococcus obeum</i>                                                                                                         | NT                              | No signals from<br>other labelled<br>DNA recorded                                             |

| Probe name                        | Full name <sup>a</sup> | Target organism(s)                                                            | Sequence (5'-3')           | Predicted probe specificity                                                                   | Hybridisation with pure culture | Actual specificity                          |
|-----------------------------------|------------------------|-------------------------------------------------------------------------------|----------------------------|-----------------------------------------------------------------------------------------------|---------------------------------|---------------------------------------------|
| Ccluster XIVab <sup>j</sup>       | S-*-Erec-0482-a-A-19   | <i>Clostridium coccooides</i> -<br><i>Eubacterium rectale</i><br>group        | GCT TCT TAG TCA RGT ACC G  | <i>Clostridium coccooides</i> - <i>Eubacterium rectale</i> group                              | NT                              | No signals from other labelled DNA recorded |
| <i>C. leptum</i> grp <sup>k</sup> | S-G-Clept-1240-a-A-18  | <i>Clostridium leptum</i>                                                     | GTTTTTRTCAACGGCAGTC        | <i>Clostridium leptum</i> subgroup                                                            | +                               | Target group                                |
| <i>C. leptum</i> <sup>1</sup>     | S-S-Bact-0205-a-S-22   | <i>Clostridium leptum</i>                                                     | ATAGGTTGATCAAAGGAGCAA<br>T | <i>Clostridium leptum</i>                                                                     | +                               | Species                                     |
| <i>C. leptum</i> <sup>2</sup>     | S-S-Bact-0441-a-S-21   | <i>Clostridium leptum</i>                                                     | ACCTCTGTTCTTAGTGACGAT      | <i>Clostridium leptum</i>                                                                     | +                               | Species                                     |
| <i>Salmonella</i> genus (SAL455)  | S-F-Bact-0455-a-S-20   | <i>Salmonella</i><br>Typhimurium                                              | TGTTGTGGTTAATAACCGCA       | Specificity to a wide range of the <i>Salmonella</i> genus                                    | +                               | Genus                                       |
| Universal 1                       | S-D-Bact-0338-a-A-18   | Superkingdom bacteria                                                         | GCTGCCTCCCGTAGGAGT         | Most bacteria                                                                                 | +                               | Domain bacteria                             |
| Thermus Thermoph1                 | S-G-Bact-0200-a-S-20   | <i>Thermus thermophilus</i>                                                   | GGTGTGTCCAAAGGGC           | <i>Thermus thermophilus</i>                                                                   | +                               | Species                                     |
| Thermus Thermoph2                 | S-G-Bact-0158-a-S-18   | <i>Thermus thermophilus</i>                                                   | GGGAAACTCGGGCTAATC         | Thermus genus                                                                                 | +                               | Target species                              |
| Thermus Thermoph3                 | S-G-Bact-1012-a-S-16   | <i>Thermus thermophilus</i>                                                   | CGGGTGAAAGCCTGGG           | <i>Thermus thermophilus</i>                                                                   | +                               | Species                                     |
| BLON135a                          | S-G-Bact-0135-a-S-19   | <i>Bifidobacterium longum</i> , <i>B. infantis</i> and <i>B. adolescentis</i> | GCCCCATACACCGGAATAG        | Probe used for melting curve profile only. It was not applied to determine bacterial presence | +                               | N/A                                         |

| Probe name        | Full name <sup>a</sup> | Target organism(s)              | Sequence (5'-3')            | Predicted probe specificity                                                                   | Hybridisation with pure culture | Actual specificity |
|-------------------|------------------------|---------------------------------|-----------------------------|-----------------------------------------------------------------------------------------------|---------------------------------|--------------------|
| BLON135b          | S-G-Bact-0135-a-S-19   | <i>Bifidobacterium animalis</i> | GCCCCATGCACCGGAATAG         | Probe used for melting curve profile only. It was not applied to determine bacterial presence | +                               | N/A                |
| BLON135c          | S-G-Bact-0135-a-S-19   | <i>Bifidobacterium bifidum</i>  | GCCCCAGACTCCGGAATAG         | Probe used for melting curve profile only. It was not applied to determine bacterial presence | +                               | N/A                |
| Negative control1 | N/A                    | None                            | AGTCAGTCAGTCAGTCAGTC        | None                                                                                          | -                               | -                  |
| Negative control2 | N/A                    | None                            | AAGGTTCCAAGGTTCCAAGG        | None                                                                                          | -                               | -                  |
| Negative control3 | N/A                    | None                            | GGAAACCCTTTGGGAAACCC        | None                                                                                          | -                               | -                  |
| Negative control4 | N/A                    | None                            | GGAAACCTGTAGCCCTTTCC        | None                                                                                          | -                               | -                  |
| Negative control5 | N/A                    | None                            | GGGTTTCACAAGGTAAGAATG<br>TG | None                                                                                          | -                               | -                  |

<sup>a</sup> Nomenclature of the oligonucleotide probe according to Alm et al. [57]; <sup>b</sup> Probe designed by Matsuki et al. [58]; <sup>c</sup> Probe designed by Kok et al. [59]; <sup>d</sup> Probe designed by Roy et al. [53]; <sup>e</sup> Probe designed by Wang et al. [60], <sup>f</sup> Probe designed by Meier et al. [61], <sup>g</sup> Probe designed by Ventura et al., [62]; <sup>h</sup> Probe designed by Ward and Timmins, [63]; <sup>i</sup> Probe designed by Wang et al. [64]; <sup>j</sup> Probe designed by Franks et al. [1], <sup>k</sup> Probe designed by Sghir et al. [65]; <sup>l</sup> Probe designed by Wang et al. [66].

<sup>m</sup>Predicted probe specificity indicates the proposed specificity using BLASTn [17] during February 2006.

<sup>n</sup>Hybridisation with pure culture results: +, positive hybridisation; -, no hybridisation; NT, not tested; FP, false positive
