# Supplementary material for: A short-oligonucleotide microarray that allows improved detection of gastrointestinal tract microbial communities
Source: PubMed Central journal article supplement (PMC2628385; doi:10.1186/1471-2180-8-195), 2008-11-11
Supplement: 1471-2180-8-195-S4.pdf [file 1471-2180-8-195-S4.pdf]

Additional file 4 - Unique oligonucleotide probes mainly 16-21-mer in length designed for the short community microarray. The total number of probes designed were 230.

| Probe name                          | $T_m$ (NN) | Probe length | Probe Sequence (5'-3')*  | Predicted probe specificity and nucleotide differences to other bacterial 16S ribosomal gene sequences                                                                                                                                                                                                                                                                                                                                     | Reference                             | Notes                |
|-------------------------------------|------------|--------------|--------------------------|--------------------------------------------------------------------------------------------------------------------------------------------------------------------------------------------------------------------------------------------------------------------------------------------------------------------------------------------------------------------------------------------------------------------------------------------|---------------------------------------|----------------------|
| <i>A. laidlawii</i> 1               | 49.9       | 18           | TGTGGTGTAAGTGCAGTG       | <i>Acholeplasma laidlawii</i> and <i>Mesoplasma pleciae</i> . All other sequences had at least 2 nt differences and were eukaryotic.                                                                                                                                                                                                                                                                                                       | This study                            |                      |
| <i>A. laidlawii</i> 2               | 49.5       | 19           | CGGAGGCTWACAGATGTAC      | <i>Acholeplasma laidlawii</i> and <i>Mesoplasma pleciae</i> . 1 nt difference to <i>Acholeplasma palmae</i> and remaining sequences had at least 3 nt differences, all of which were eukaryotic.                                                                                                                                                                                                                                           | This study                            |                      |
| <i>A.laidlawii</i> 3                | 49.7       | 17           | ACGCTGTGAGGCTATGA        | <i>Acholeplasma laidlawii</i> , no other similar sequences with homology to this probe.                                                                                                                                                                                                                                                                                                                                                    | This study                            |                      |
| <i>A.laidlawii</i> 4                | 43.1       | 16           | GGATGTGTGCATGAAA         | <i>Acholeplasma laidlawii</i> , no other similar sequences with homology to this probe.                                                                                                                                                                                                                                                                                                                                                    | This study                            |                      |
| <i>A. fermentans</i>                | 52.0       | 24           | GCACCGATCTATAATACATTTTGG | <i>Acidaminococcus fermentans</i> , no other similar sequences with homology to this probe.                                                                                                                                                                                                                                                                                                                                                | This study                            |                      |
| <i>Actinobacterium</i> genus        | 49.9       | 18           | ACTCGCAGAATAAGCACC       | Specific for all <i>Actinobacterium</i> . Also specific to <i>Achromobacter xylooxidans</i> , <i>Paenibacillus</i> spp., <i>Pseudomonas aeruginosa</i> (all 3 from oily sludge), <i>P. citronellolis</i> (unknown source), <i>Dexia gummosa</i> , <i>Alkanindiges hongkongensis</i> and one eukaryotic sequence. 1 nt difference from an <i>Actinobacter</i> spp. and all remaining sequences had at least 2 nt differences to this probe. | This study                            |                      |
| Alphaproteobacteria                 | 52.0       | 18           | GGTAAGGTTCTGCGCGTT       | Alphaproteobacteria (except Rickettsiales).                                                                                                                                                                                                                                                                                                                                                                                                | Neef <i>et al.</i> (1997) (probeBase) | 84.7% total coverage |
| Alpha-Deltaproteobacteria           | 52-54      | 17           | CGTTCGYTCTGAGCCAG        | Alphaproteobacteria, some Deltaproteobacteria and Spirochaetes.                                                                                                                                                                                                                                                                                                                                                                            | Manz <i>et al.</i> (1992) (probeBase) | 84.7% total coverage |
| <i>A. burkinabensis</i>             | 51.0       | 22           | TTTCGCATGGAGATGATA       | <i>Anaerovibrio burkinabensis</i> . Next nearest bacterial sequence homology has 4 nt difference to this probe.                                                                                                                                                                                                                                                                                                                            | This study                            |                      |
| <i>B. alcalophilus</i>              | 49.3       | 17           | CCGTTCGAATAGGTCGG        | <i>Bacillus alcalophilus</i> , six <i>Bacillus</i> spp., seven uncultured microorganisms, <i>Cerasibacillus quisquiliarum</i> (non gut source) and <i>Brevibacillus</i> spp. No further sequence homologies                                                                                                                                                                                                                                | This study                            |                      |
| <i>B. distasonis</i> 1 <sup>#</sup> | 50.0       | 18           | GGTGGTAATGCCGGATG        | This probe has specificity to a wide range of Bifidobacteria but none bound in the pure culture tests. However it did have specificity to <i>Bacteroides distasonis</i> which was complemented by the <i>B. distasonis</i> 2 probe.                                                                                                                                                                                                        | Matsuki <i>et al.</i> (2002)          |                      |

|                                     |      |    |                      |                                                                                                                                                                                                                                                                                                                                                                                                                                                                                                                                                                                  |                               |                                                                                                                      |
|-------------------------------------|------|----|----------------------|----------------------------------------------------------------------------------------------------------------------------------------------------------------------------------------------------------------------------------------------------------------------------------------------------------------------------------------------------------------------------------------------------------------------------------------------------------------------------------------------------------------------------------------------------------------------------------|-------------------------------|----------------------------------------------------------------------------------------------------------------------|
| <i>B. distasonis</i> 2 <sup>#</sup> | 50.0 | 18 | TGCCAAGCCATTACTGAC   | <i>Bacteroides distasonis</i> and two uncultured bacteria from the human gut. 2 nt difference to two uncultured deep sea bacteria, <i>Mycobacterium leprae</i> , <i>Yersinia pestis</i> and <i>Streptococcus pneumoniae</i> . At least 3 nt differences to all remaining sequences, most of which were eukaryotic.                                                                                                                                                                                                                                                               | This study                    |                                                                                                                      |
| <i>B. fragilis</i> grp <sup>#</sup> | 45.0 | 20 | CAGTATCAACTGCAATTTTA | <i>Bacteroides fragilis</i> , <i>B. thetaiotaomicron</i> , <i>B. stercoris</i> , <i>B. vulgatus</i> , <i>B. caecae</i> , <i>B. uniformis</i> , <i>B. eggerthii</i> , <i>Prevotella zoogloformans</i> and <i>P. heparinolytica</i> . All other sequence hits had at least 2 nt difference from this probe and many were uncultured.                                                                                                                                                                                                                                               | Matsuki <i>et al.</i> (2002). | The first 5' nucleotide was removed from the primer to cover all <i>B. fragilis</i> strains in the Genbank database. |
| <i>B. longum</i> grp2 <sup>#</sup>  | 46.0 | 21 | TAAATTCAGTTGATACTGT  | <i>Bacteroides fragilis</i> , twelve uncultured bacteria from human, equine, waste water, and wet wood sources. 1 nt difference to <i>Bacteroides thetaiotaomicron</i> , <i>B. stercoris</i> , <i>B. vulgatus</i> , <i>B. caecae</i> , <i>B. uniformis</i> , <i>B. eggerthii</i> , <i>Prevotella zoogloformans</i> , <i>P. heparinolytica</i> and many unidentified bacteria from human gut sources. 2 nt difference or more to all remaining sequences.                                                                                                                         | Matsuki <i>et al.</i> (2002)  |                                                                                                                      |
| Bacteroides <sup>#</sup>            | 50.0 | 19 | CAAGTAGCGTGAAGGATGA  | <i>Bacteroides caecae</i> , <i>B. eggerthii</i> , <i>B. fragilis</i> , <i>B. merdae</i> , <i>B. ovatus</i> , <i>B. thetaiotaomicron</i> , <i>B. uniformis</i> , <i>B. vulgatus</i> , <i>B. stercoris</i> . Also covers one strain of <i>Prevotella heparinolytica</i> and many uncultured bacteria from human, chicken, rumen, swine pit and equine sources. 1 nt difference to uncultured faecal bacteria, 2 nt difference to two further uncultured faecal bacteria and 3 nt difference to eighteen others including <i>Salmonella</i> Typhi and <i>Enterococcus faecium</i> . | This study                    |                                                                                                                      |
| <i>B. merdae</i>                    | 50.0 | 17 | TGGCGACAGGATGCTAA    | <i>Bacteroides merdae</i> , <i>Bacteroides acidofaciens</i> and <i>Bacteroides eggerthii</i> . 1 nt difference to several eukaryotic sequences and 2 nt difference to <i>Prevotella tanneriae</i> and <i>Bacteroides ovatus</i> .                                                                                                                                                                                                                                                                                                                                                | This study                    |                                                                                                                      |
| <i>B. ovatus</i>                    | 50.2 | 19 | TTACTGACACTGATGCTCG  | <i>Bacteroides ovatus</i> and one uncultured <i>Bacteroides</i> spp. 2 nt difference to <i>Bacteroides fragilis</i> , <i>B. thetaiotaomicron</i> , <i>B. acidofaciens</i> , <i>Yersinia pestis</i> and fifteen uncultured bacteria from the human gut.                                                                                                                                                                                                                                                                                                                           | This study                    |                                                                                                                      |
| <i>B. putredinis</i> 1              | 50.0 | 16 | GCAGGATGACGGCTCT     | <i>Bacteroides putredinis</i> , three <i>Bacteroides</i> spp. and six uncultured bacteria from human and rumen GI tracts. 1 nt difference to <i>Salmonella enterica</i> , <i>Brucella melitensis</i> and <i>B. suis</i> . All remaining similar sequences were eukaryotic                                                                                                                                                                                                                                                                                                        | This study                    |                                                                                                                      |

|                                               |      |    |                         |                                                                                                                                                                                                                                                                                                                                                                  |                           |                                                                                                           |
|-----------------------------------------------|------|----|-------------------------|------------------------------------------------------------------------------------------------------------------------------------------------------------------------------------------------------------------------------------------------------------------------------------------------------------------------------------------------------------------|---------------------------|-----------------------------------------------------------------------------------------------------------|
| <i>B. putredinis</i> 2                        | 49.9 | 20 | ATTCCGATGGTTAGAGATGG    | <i>Bacteroides putredinis</i> and two uncultured bacteria from the human gut. All remaining similar sequences were eukaryotic and had 5 nt difference to this probe.                                                                                                                                                                                             | This study                |                                                                                                           |
| <i>B. putredinis</i> 3                        | 50.0 | 17 | AAGTTCGTGACCGCAAG       | <i>Bacteroides putredinis</i> and twenty-one other unknowns from rumen, human and equine GI tract sources. 2 nt difference to the only other bacteria with a sequence similarity to this probe - <i>Mycobacterium avium</i> .                                                                                                                                    | This study                |                                                                                                           |
| <i>B. putredinis</i> 4                        | 50.1 | 19 | TACCGTTAGTTGCCATCAG     | <i>Bacteroides putredinis</i> and thirteen other unknown GI tract bacteria from human and mice. 1 nt difference to <i>Desulfotomaculum alkaliphilum</i> and two uncultured bacteria from mice GI tracts, 2 nt difference to sixteen other bacteria whose enumerated source in included the rumen, termite and horse gut. 3 nt difference to many other bacteria. | This study                |                                                                                                           |
| <i>B. splanchnicus</i>                        | 49.9 | 20 | TCCTATTAGTTAGTTGGCGG    | <i>Bacteroides splanchnicus</i> , two planctomycetales clones, a single uncultured bacteria and a <i>Eubacterium</i> clone. 1 nt difference to a second plantomycetes clone and all remaining similar bacterial sequences had 3 nt difference.                                                                                                                   | This study                |                                                                                                           |
| <i>B. stercoris</i>                           | 50.1 | 19 | TGAATCGGAAACGGTTCTT     | <i>Bacteroides stercoris</i> . 1 nt difference to two uncultured bacteria from the human gut. All remaining similar sequences were eukaryotic and had 2 to 4 nt differences.                                                                                                                                                                                     | This study                |                                                                                                           |
| <i>B. thetaiotaomicron</i> & <i>B. ovatus</i> | 51.0 | 23 | GGTACATACAAAATTCCACACGT | <i>Bacteroides thetaiotaomicron</i> , <i>B. ovatus</i> and fifteen uncultured or <i>Bacteroides</i> spp. from human and Crohn's disease patients. 1 nt difference to <i>B. acidofaciens</i> , <i>B. caccae</i> and several other uncultured bacteria from the human gut. The next similar sequences had 6 nt difference to this probe.                           | Wang <i>et al.</i> (1996) |                                                                                                           |
| <i>B. thetaiotaomicron</i>                    | 52.0 | 20 | GGCAGCATTTTCAGTTTGCTT   | <i>Bacteroides thetaiotaomicron</i> and four uncultured bacteria from the human gut. 2 nt difference or more and all remaining sequences which were eukaryotic.                                                                                                                                                                                                  | Wang <i>et al.</i> (1996) | The 3' G of the primer was removed to bring the NN temperature to within the microarray probe boundaries. |
| <i>B. vulgatus</i> 1                          | 49.9 | 17 | CGCAAGGCATCTGTGAA       | <i>Bacteroides vulgatus</i> and thirty-six uncultured microorganisms. 1 nt difference to <i>Methanosarcina mazei</i> and 2 nt difference or more all other sequences which were eukaryotic.                                                                                                                                                                      | This study                |                                                                                                           |
| <i>B. vulgatus</i> 2                          | 50.1 | 19 | CTACTCTTGGACAGCCTTC     | <i>Bacteroides vulgatus</i> and five uncultured bacteria from the human gut. 2 nt difference to twenty-five uncultured bacteria from the human gut and 4 nt difference to remaining sequences which were all eukaryotic.                                                                                                                                         | This study                |                                                                                                           |

|                                                          |      |    |                       |                                                                                                                                                                                                                                                                                                                          |                               |                                                                                                                                             |
|----------------------------------------------------------|------|----|-----------------------|--------------------------------------------------------------------------------------------------------------------------------------------------------------------------------------------------------------------------------------------------------------------------------------------------------------------------|-------------------------------|---------------------------------------------------------------------------------------------------------------------------------------------|
| <i>B. adolescentis</i> <sup>#</sup>                      | 49.0 | 21 | GGAAAGATTCTATCGGTATGG | <i>Bifidobacterium adolescentis</i> , <i>B. ruminatum</i> and five unknown bacteria. 1 nt difference to two <i>Bifidobacterium</i> spp. from human faeces and two <i>B. angulatum</i> strains. 5 nt difference to <i>B. bifidum</i> and all remaining similar sequences had 6 nt differences and belonged to eukaryotes. | Matsuki <i>et al.</i> (2002). |                                                                                                                                             |
| <i>B. angulatum</i> <sup>#</sup>                         | 52.0 | 18 | CAGTCCATCGCATGGTGG    | <i>Bifidobacterium angulatum</i> . 2 nt difference to the next nearest similar sequences which were all <i>Streptomyces</i>                                                                                                                                                                                              | Matsuki <i>et al.</i> (2002)  | The 3' T was removed so the NN temperature was within the temperature range of microarray probes.                                           |
| <i>B. bifidum</i> <sup>#</sup>                           | 52.0 | 20 | CCACATGATCGCATGTGATTG | <i>Bifidobacterium bifidum</i> , <i>B. cuniculi</i> and four uncultured bacteria from the human gut. 4 nt difference or more to all remaining sequences which were eukaryotic.                                                                                                                                           | Matsuki <i>et al.</i> (2002)  | The 3' G was removed so the NN temperature was within the temperature range required for the microarray probes                              |
| <i>B. breve</i>                                          | 51.0 | 18 | CCGGATGCTCCATCACAC    | <i>Bifidobacterium breve</i> . 3 nt difference to any other sequences which were all were eukaryotic.                                                                                                                                                                                                                    | Matsuki <i>et al.</i> (2002)  |                                                                                                                                             |
| <i>B. longum</i> grp & <i>B. breve</i> <sup>#</sup>      | 52.0 | 18 | CGACGATCCCAGAGATGG    | <i>Bifidobacterium infantis</i> , <i>B. breve</i> , <i>B. indicum</i> , four uncultured bacteria from the human gut and one <i>B. longum</i> strain. 2 nt difference to all remaining sequences which were all eukaryotic.                                                                                               | Matsuki <i>et al.</i> (2002)  | The 3' G was removed from the end of the primer to bring it into the NN temperature range of the microarray.                                |
| <i>Bifidobacterium longum</i> general group <sup>#</sup> | 51.0 | 19 | TTCCAGTTGATCGCATGGT   | <i>Bifidobacterium longum</i> , <i>B. infantis</i> , <i>B. suis</i> , <i>B. pseudolongum</i> . The only other similar sequence were from eukaryotes. Note: This probe is non-specific                                                                                                                                    | Matsuki <i>et al.</i> (2002)  |                                                                                                                                             |
| <i>B. longum</i> grp1 <sup>#</sup>                       | 52.0 | 18 | GTTCCCGACGGTCGTAGA    | <i>Bifidobacterium longum</i> , <i>B. pseudolongum</i> , <i>B. infantis</i> and fifteen uncultured bacteria all from human/infants faeces. 1 nt difference to unidentified <i>Bifidobacterium</i> spp.. 3 nt difference from <i>B. suis</i> , <i>B. dentium</i> and all remaining similar sequences were eukaryotic.     | Matsuki <i>et al.</i> (2002)  | The 3' G of the primer was removed to bring the NN temperature to within the range set for the microarray.                                  |
| <i>B. longum</i> grp3 <sup>#</sup>                       | 54.0 | 18 | TATCGGGGAGCAAGCGAG    | <i>Bifidobacterium longum</i> , <i>B. infantis</i> , <i>B. pulluorum</i> , <i>B. gallinarum</i> , <i>B. saeculare</i> and <i>B. subtilis</i> . 2 nt to the next nearest sequences which were eukaryotic                                                                                                                  | Roy <i>et al.</i> (1996)      | Removal of the 3' CT brought the NN temperature down to as close to the microarray boundaries as possible without compromising specificity. |
| <i>B. pseud</i> & <i>catenulatum</i> <sup>#</sup>        | 50.0 | 16 | CGGATGCTCCGACTCC      | <i>Bifidobacterium pseudocatenulatum</i> , <i>B. catenulatum</i> , <i>B. thermacidophilum</i> and ten uncultured bacteria from humans, 1 nt to next similar sequences which were all eukaryotic.                                                                                                                         | Matsuki <i>et al.</i> (2002)  | Removal of the 3' T brought the NN temperature to within the range required for the microarray.                                             |

|                                |      |    |                         |                                                                                                                                                                                                                                                                                                                     |                              |                                                                                                                                    |
|--------------------------------|------|----|-------------------------|---------------------------------------------------------------------------------------------------------------------------------------------------------------------------------------------------------------------------------------------------------------------------------------------------------------------|------------------------------|------------------------------------------------------------------------------------------------------------------------------------|
| <i>B. crossotus</i>            | 50.1 | 18 | CGGCATCACAAGTCAGAA      | <i>Butyrivibrio crossotus</i> . 1 nt difference to five uncultured bacteria and <i>Lachnospira pectinoschiza</i> from the pig GI tract. All remaining similar sequences had at least 3 nt difference to this probe.                                                                                                 | This study                   |                                                                                                                                    |
| <i>B. fibrisolvens</i>         | 48.0 | 18 | GACCTCGTAAGAGGGGAT      | <i>Butyrivibrio fibrisolvens</i> and one uncultured rumen bacteria. 2 nt difference to the only other bacterial sequences.                                                                                                                                                                                          | This study                   |                                                                                                                                    |
| <i>C. jejuni</i>               | 46.1 | 19 | AGTTGAGTAGGGAAAGTTT     | <i>Campylobacter jejuni</i> and <i>C. coli</i> . 3 nt difference to all remaining similar sequences which all were eukaryotic.                                                                                                                                                                                      | This study                   |                                                                                                                                    |
| <i>C. coli</i> & <i>jejuni</i> | 48.0 | 23 | ATCTAATGGCTTAACCATTAAAC | <i>Campylobacter coli</i> , <i>C. helveticus</i> , <i>C. hyointestinalis</i> , <i>C. jejuni</i> and <i>C. upsaliensis</i> . 2 nt difference to the next nearest sequences, all of which were eukaryotic.                                                                                                            | Inglis and Kalischuk (2003)  |                                                                                                                                    |
| <i>Campylobacter</i>           | 50.0 | 19 | GGATGACACTTTTCGGAGC     | The <i>Campylobacter</i> genus. 2 nt difference to <i>Streptococcus mutans</i> and 3 nt to an uncultured <i>Eubacterium</i> . All remaining similar sequences were eukaryotic.                                                                                                                                      | Inglis <i>et al.</i> (2003)  |                                                                                                                                    |
| Carnobacteria                  | 47.0 | 18 | GAATCATGCGATTCTGA       | <i>Carnobacterium gallinarum</i> , <i>C. piscicola</i> , <i>C. maltaromaticum</i> and one uncultured <i>Clostridium</i> spp. from a non-gut source. 3 nt difference to next nearest bacterial sequences.                                                                                                            | Barakat <i>et al.</i> (2000) | 2 nts were removed from the 3' end of the primer to bring the NN temperature range of the probe within the range of the microarray |
| <i>C. butyricum</i>            | 52.0 | 20 | TACCGCATGGTACAGCAATT    | <i>Clostridium butyricum</i> and thirteen uncultured bacteria from pig GI tracts, waste water and human guts. 1 nt difference to nineteen uncultured bacteria from rumen, human and pig GI tracts. All remaining similar sequences had 5 nt difference to this probe and were eukaryotic.                           | Kikuchi <i>et al.</i> (2002) |                                                                                                                                    |
| <i>C. aminovalericum</i>       | 47.7 | 19 | GTTCAACTTCGTTSAACTC     | <i>Clostridium aminovalericum</i> . Specific by 4 nt to any other organism. To cover both <i>C. aminovalericum</i> (M23929 and X73436) at position 14 where a C is present in one sequence and a G in the other, the probe was made degenerate.                                                                     | This study                   |                                                                                                                                    |
| <i>C. bifermentans</i>         | 52.0 | 17 | CAAGTCGAGCGATCTCT       | <i>Clostridium bifermentans</i> , five uncultured bacteria from swine pits or deepsea hydrothermal vents and a single <i>C. paraputrificum</i> . 1 nt difference to two uncultured bacteria and <i>C. hiranonis</i> . 2 nt difference to <i>C. lituseburensis</i> and a single uncultured bacteria from cow faeces. | Kikuchi <i>et al.</i> (2002) |                                                                                                                                    |
| <i>C. celatum</i>              | 50.2 | 21 | ACGATGAATACTATGAGCACT   | <i>Clostridium celatum</i> . 5 nt difference to <i>Bacillus cereus</i> and all remaining similar sequences had 6 nt difference.                                                                                                                                                                                     | This study                   |                                                                                                                                    |

|                                   |           |    |                         |                                                                                                                                                                                                                                                                                                                                                      |                              |                                                                        |
|-----------------------------------|-----------|----|-------------------------|------------------------------------------------------------------------------------------------------------------------------------------------------------------------------------------------------------------------------------------------------------------------------------------------------------------------------------------------------|------------------------------|------------------------------------------------------------------------|
| <i>C. clostridiformes</i> 1       | 49.0      | 16 | CACCGAAGGCTTTGCC        | <i>Clostridium clostridiformes</i> and four uncultured bacteria from the human GI tract, sewage and rumen. 1 nt difference to <i>Pseudomonas putida</i> , <i>Bradyrhizobium japonicum</i> and <i>Pyrococcus abyssi</i> (all from non-gut sources). All remaining similar sequences were eukaryotic.                                                  | Kikuchi <i>et al.</i> (2002) |                                                                        |
| <i>C. clostridiformes</i> 2       | 52.0      | 23 | GAAGTTTTCGGATGGAATCTTGA | <i>Clostridium clostridiformes</i> and one uncultured bacteria from the human gut. Note: This probe only covered half the strains from this species when clustalled. 2 nt difference to uncultured bacteria from activated sludge and the next most similar sequences were divergent by 4 nt.                                                        | Kikuchi <i>et al.</i> (2002) |                                                                        |
| CclusterI                         | 43-52     | 21 | CARGRGATGTCAAGCYAGGT    | Too many 16S ribosomal gene target matches to define full probe specificity using BLASTn                                                                                                                                                                                                                                                             | Van Dyke and McCarthy (2002) |                                                                        |
| CclusterIII                       | 38-51     | 19 | GRCAGTATDCTGACCTRCC     | Too many 16S ribosomal gene target matches to define full probe specificity using BLASTn                                                                                                                                                                                                                                                             | Van Dyke and McCarthy (2002) |                                                                        |
| CclusterIV                        | 43.0      | 17 | TTACTGGGTGTAAAGGG       | Too many 16S ribosomal gene target matches to define full probe specificity using BLASTn                                                                                                                                                                                                                                                             | Van Dyke and McCarthy (2002) |                                                                        |
| CclusterXIVab <sup>#</sup>        | 47.0-50.0 | 19 | CGGTACYTGACTAAGAAGC     | Too many 16S ribosomal gene target matches to define full probe specificity using BLASTn                                                                                                                                                                                                                                                             | Van Dyke and McCarthy (2002) |                                                                        |
| <i>C. coccooides</i>              | 49.0      | 19 | GCTTCTTAGTCARGTACCG     | <i>C. coccooides</i> and many uncultured bacteria                                                                                                                                                                                                                                                                                                    | Franks <i>et al.</i> (1998)  |                                                                        |
| <i>C. cocleatum</i>               | 50.0      | 19 | CTCGGATGTCATTTCTCC      | <i>Clostridium cocleatum</i> and 2 nt difference to the next most similar sequences which were all eukaryotic.                                                                                                                                                                                                                                       | Kikuchi <i>et al.</i> (2002) |                                                                        |
| <i>C. difficile</i>               | 50.0      | 21 | CTACAATCCGAACTGAGAGTA   | <i>Clostridium difficile</i> , four uncultured bacteria from hydrothermal vents and <i>Alvinella pompejana</i> . 1 nt difference to twenty-three strains including five <i>Bacillus</i> spp. and five uncultured bacteria. Next most similar sequences had 2 nt differences and many were from <i>Helicobacter</i> spp. and <i>Enterococcus</i> spp. | Kikuchi <i>et al.</i> (2002) | Only five examples of <i>C. difficile</i> were present in the database |
| <i>C. innocuum</i>                | 50.0      | 17 | GTCGCTGCTCTTTGTGG       | <i>Clostridium innocuum</i> . 2 nt difference to the next nearest similar prokaryotic sequence which included <i>Eubacterium cylindroides</i> and many eukaryotes.                                                                                                                                                                                   | Kikuchi <i>et al.</i> (2002) |                                                                        |
| <i>C. leptum</i> 1 <sup>#</sup>   | 51.0      | 21 | ACCTCTGTTCTTAGTGACGAT   | <i>Clostridium leptum</i> . 1 nt difference to two uncultured bacteria from non-gut sources and eukaryotes. All remaining similar sequences had 5 nt or more divergence.                                                                                                                                                                             | Wang <i>et al.</i> (1994)    |                                                                        |
| <i>C. leptum</i> 2 <sup>#</sup>   | 51.0      | 22 | ATAGGTTGATCAAAGGAGCAAT  | <i>Clostridium leptum</i> . 4 nt difference to an uncultured bacterium from soil and all remaining sequences had 5 nt divergence.                                                                                                                                                                                                                    | Wang <i>et al.</i> (1994)    |                                                                        |
| <i>C. leptum</i> grp <sup>#</sup> | 45-46     | 18 | GTTTTTRCAACGGCAGTC      | Too many 16S ribosomal gene target matches to define full probe specificity using BLASTn                                                                                                                                                                                                                                                             | Sghir <i>et al.</i> (2000)   |                                                                        |

|                            |         |    |                        |                                                                                                                                                                                                                                                                       |                              |                                                                                                                                                                                                |
|----------------------------|---------|----|------------------------|-----------------------------------------------------------------------------------------------------------------------------------------------------------------------------------------------------------------------------------------------------------------------|------------------------------|------------------------------------------------------------------------------------------------------------------------------------------------------------------------------------------------|
| <i>C. nexile</i>           | 49 - 53 | 18 | RCCTGYGAGGGKAAGCAA     | <i>Clostridium nexile</i> , four bacteria from non-gut sources, a single uncultured bacteria from the rumen of a yak and five uncultured bacteria from the human gut. 2 nt or greater sequence divergence from any further prokaryotic sequences.                     | Kikuchi <i>et al.</i> (2002) | After clustaling, the primer was found only to cover two <i>C. nexile</i> sequences in the NCBI database. It needed three variable nucleotides to added for coverage of the remaining strains. |
| <i>C. paraputrificum</i>   | 49.0    | 22 | CCTGAATTACCATGTAATGTGG | <i>Clostridium paraputrificum</i> and one uncultured sequence from a human new-born. 5 nt difference to any other bacteria.                                                                                                                                           | Kikuchi <i>et al.</i> (2002) |                                                                                                                                                                                                |
| <i>C. perfringens</i> 1    | 48.0    | 20 | AGATGGCATCATCATTCAAC   | <i>Clostridium perfringens</i> and eleven uncultured sequences from human, pigs and rat GI tracts plus from unidentified sources. 3 nt difference to the next most similar bacteria which was an uncultured from the human gut.                                       | Kikuchi <i>et al.</i> (2002) |                                                                                                                                                                                                |
| <i>C. perfringens</i> 2    | 48.0    | 18 | GCAAGGGATGTCAAGTGT     | <i>Clostridium perfringens</i> and nine uncultured bacteria from human and pig GI tracts. 2 nt difference to several Clostridia from the gut human, the most common match from <i>Clostridium botulinum</i> .                                                         | Kikuchi <i>et al.</i> (2002) |                                                                                                                                                                                                |
| <i>C. perfringens</i> 3    | 48.0    | 20 | AGATGGCATCATCATTCAAC   | <i>Clostridium perfringens</i> and eleven uncultured from human, pig and rat GI tracts. 3 nt difference to a few uncultured bacteria from the human gut.                                                                                                              | Kikuchi <i>et al.</i> (2002) |                                                                                                                                                                                                |
| <i>C. perfringens</i> 4    | 45.4    | 18 | ATGGCATCATCATTCAAC     | Only one strain of <i>Clostridium perfringens</i> and 10 uncultured bacteria from a variety of sources. All other <i>C. perfringens</i> strains had 2 nt divergence to this probe                                                                                     | This study                   | This probe was not added to the microarray because the NN temperature was below the range required and there were already three other <i>C. perfringens</i> probes.                            |
| <i>C. proteolyticum</i>    | 50.0    | 20 | CCTTGTGTAGTTGCTACC     | <i>Clostridium proteolyticum</i> , <i>C. histolyticum</i> , <i>Clostridium limosum</i> and five unknown bacteria from sewage. 1 internal nt difference to a large number of Clostridia. 2 nt differences to <i>Flavobacterium psychrophilum</i> and unknown bacteria. | This study                   |                                                                                                                                                                                                |
| <i>C. ramosum</i> 1        | 51.0    | 21 | GTGACCGTATTAAAAGTGCCT  | <i>Clostridium ramosum</i> and 5 uncultured bacteria (only 2 from a gut source). 2 nt difference to <i>C. cocleatum</i> and <i>C. spiroforme</i> . Remaining sequence matches had 6 nt or more divergence.                                                            | Kikuchi <i>et al.</i> (2002) |                                                                                                                                                                                                |
| <i>Clostridium ramosum</i> | 49.0    | 17 | TACCGTCACTCGGCTAC      | <i>Clostridium ramosum</i> and four uncultured bacteria, two of which were from gut sources. 1 nt difference to eukaryotic sequences and 2 nt divergence to two uncultured bacteria from non-gut sources. No other sequence matches.                                  | Kikuchi <i>et al.</i> (2002) |                                                                                                                                                                                                |

|                            |       |    |                      |                                                                                                                                                                                                                                                                                                                                                                             |                              |                                                                                                            |
|----------------------------|-------|----|----------------------|-----------------------------------------------------------------------------------------------------------------------------------------------------------------------------------------------------------------------------------------------------------------------------------------------------------------------------------------------------------------------------|------------------------------|------------------------------------------------------------------------------------------------------------|
| <i>C. sordellii</i>        | 51.0  | 16 | GTCGAGCGACCTTCGG     | <i>Clostridium sordellii</i> and <i>Rhodovulum</i> spp. (phototrophic bacteria). 1 nt difference to <i>Streptococcus mutans</i> (human oral cavity) and all remaining sequences did not originate from gut sources.                                                                                                                                                         | Kikuchi <i>et al.</i> (2002) | This study removed the G from the 5' position of the probe to bring the NN melting temperature into range. |
| <i>C. leptum</i> sub-group | 53-57 | 18 | TAAAGCCCAGYAGGCCGC   | <i>Clostridium sporosphaeroides</i> , <i>Ruminococcus bromii</i> , <i>C. leptum</i> and one unknown bacteria from rumen fluid. Too many 16S ribosomal gene target matches from uncultured bacteria to define full probe specificity using BLASTn.                                                                                                                           | Harmsen <i>et al.</i> (2002) |                                                                                                            |
| <i>C. symbiosum</i>        | 50.0  | 19 | GCGACTTACTGGACGATAA  | <i>Clostridium symbiosum</i> and three uncultured bacteria. The probe was specific by 1 nt to ten unknown bacteria and 2 nt to further unknown bacteria.                                                                                                                                                                                                                    | This study                   |                                                                                                            |
| <i>C. viride</i>           | 50.7  | 19 | CAAGTTTTTCGGACAAGGGA | <i>Clostridium viride</i> and three unidentified bacteria. 2 nt difference to one uncultured bacteria and 3 nt to further uncultured bacteria.                                                                                                                                                                                                                              | This study                   |                                                                                                            |
| <i>E. aerofaciens</i>      | 50.0  | 19 | CTTTCAGCAGGGAAGAGTC  | <i>Collinsella/Eubacterium aerofaciens</i> , <i>Coriobacterium</i> spp. (both from human faeces) and three unknown bacteria from human faeces. 2 nt difference to all other sequences which were eukaryotic.                                                                                                                                                                | Tajima <i>et al.</i> (2000)  |                                                                                                            |
| <i>C. catenaformis</i> 1   | 50.3  | 16 | TCGCATGACCGCTTCA     | <i>Coprobacillus catenaformis</i> . 1 nt difference to <i>Bradyrhizobium japonicum</i> , <i>Mesorhizobium loti</i> and <i>Geobacter sulfurreducens</i> . No other sequences were similar.                                                                                                                                                                                   | This study                   |                                                                                                            |
| <i>C. catenaformis</i> 2   | 49.7  | 20 | AATAYCCGTATGGATAGCAG | <i>Coprobacillus catenaformis</i> . All remaining bacterial sequences had 5 nt difference from this probe.                                                                                                                                                                                                                                                                  | This study                   |                                                                                                            |
| <i>C. eutactus</i> 1       | 50.0  | 18 | TCCTGATGACGGTTCCTT   | <i>Coprococcus eutactus</i> and three other uncultured bacteria all from cow/human guts. 3 nt difference to <i>Salmonella enterica</i> , <i>S. Typhimurium</i> , <i>S. enteritidis</i> and eukaryotic sequences.                                                                                                                                                            | This study                   |                                                                                                            |
| <i>C. eutactus</i> 2       | 50.0  | 19 | TACTGGACTGCTACTGACA  | <i>Coprococcus eutactus</i> , <i>Oscillatoria terebriformis</i> and three uncultured bacteria from the human gut. 2 nt difference to uncultured bacteria and 3 nt divergence to all remaining sequences.                                                                                                                                                                    | This study                   | The only example in the database of this species when the probe was designed.                              |
| Corynebacterium            | 48.0  | 17 | TTCACACCACCGTAGGG    | <i>Corynebacterium glutamicum</i> , <i>Brevibacterium taipei</i> , <i>B. seonmiso</i> , <i>B. saccharolyticum</i> , <i>B. glutamigenes</i> (All proposed to belong to the <i>Corynebacterium</i> group), <i>Rhodococcus globerulus</i> , <i>Pyrococcus abyssi</i> (Archaea) and five uncultured bacteria. 1 nt difference to all remaining sequences which were eukaryotic. | This study                   |                                                                                                            |
| <i>C. fermentans</i> 1     | 49.7  | 20 | TAGGCTGCATAGAGTAGAGA | <i>Cytophaga fermentans</i> . 5 nt difference to the next nearest bacterial sequence.                                                                                                                                                                                                                                                                                       | This study                   |                                                                                                            |



|                                  |                                          |    |                         |                                                                                                                                                                                                                                                                                                                                  |                                         |                                                                                                                                       |
|----------------------------------|------------------------------------------|----|-------------------------|----------------------------------------------------------------------------------------------------------------------------------------------------------------------------------------------------------------------------------------------------------------------------------------------------------------------------------|-----------------------------------------|---------------------------------------------------------------------------------------------------------------------------------------|
| <i>C. fermentans</i> 2           | 50.0                                     | 23 | CCGCATGGTAAATTATATAAAGC | <i>Cytophaga fermentans</i> . 4 and 5 nt difference to next similar sequences, all of which were eukaryotic. 6 nt difference to the next nearest bacterial sequence.                                                                                                                                                             | This study                              |                                                                                                                                       |
| <i>C. fermentans</i> 3           | 50.5                                     | 23 | CCGCATGGTAAATTATATAAAGC | <i>Cytophaga fermentans</i> . 4 and 5 nt difference to the next most similar sequences.                                                                                                                                                                                                                                          | This study                              |                                                                                                                                       |
| Cytophaga-Flavobacterium grp     | 49.0                                     | 18 | TGGTCCGTGTCTCAGTAC      | Cytophaga-Flavobacterium-group of the Bacteroidetes                                                                                                                                                                                                                                                                              | Manz <i>et al.</i> (1992) (probeBase)   | 90.5% total coverage                                                                                                                  |
| Cytophagales-Bacteroidales grp   | 47.0                                     | 18 | CCAATGTGGGGGACCTT       | Cytophagales - Bacteroidales-group of the Bacteroidetes                                                                                                                                                                                                                                                                          | Manz <i>et al.</i> (1992) (probeBase)   | 90.5% total coverage                                                                                                                  |
| Cytophaga-Bacteroidetes1         | 48.0                                     | 18 | TCCTCTCAGAACCCCTAC      | Cytophagales - Groups of the Bacteroidetes phylum                                                                                                                                                                                                                                                                                | Weller <i>et al.</i> (2000) (probeBase) | 90.5% total coverage                                                                                                                  |
| Cytophaga-Bacteroidetes2         | 49.0                                     | 18 | CCTTGGTAAGGTTCTCG       | Cytophagales - Groups of the Bacteroidetes phylum                                                                                                                                                                                                                                                                                | Weller <i>et al.</i> (2000) (probeBase) | 90.5% total coverage                                                                                                                  |
| Cytophaga-Bacteroidetes3         | 44 (ProbeBase described NN temp as 46°C) | 18 | GGACCCTTTAAACCCAAT      | Cytophagales - Groups of the Bacteroidetes phylum                                                                                                                                                                                                                                                                                | Weller <i>et al.</i> (2000) (probeBase) | 90.5% total coverage                                                                                                                  |
| Cytophaga-Bacteroidetes4         | 56 (ProbeBase described NN temp as 53°C) | 18 | AGCTGCCTTCGCAATCGG      | Cytophagales - Groups of the Bacteroidetes phylum                                                                                                                                                                                                                                                                                | Weller <i>et al.</i> (2000) (probeBase) | 90.5% total coverage                                                                                                                  |
| <i>D. piger</i> 1                | 50.1                                     | 16 | GGACTTCGGTCCCGAG        | <i>Desulfovibrio piger</i> , an uncultured <i>Acidobacterium</i> and uncultured bacteria from the termite gut. 1 nt difference to <i>Caulobacter crescentus</i> , <i>Pseudomonas aeruginosa</i> and eukaryotic sequences. No other similarities to other sequences.                                                              | This study                              |                                                                                                                                       |
| <i>D. piger</i> 2                | 47.7                                     | 20 | CTCATGATGAACTTTGTGAG    | <i>Desulfovibrio piger</i> , <i>D. oviles</i> and two unknown bacteria from the termite gut. Next nearest similar bacterial sequence has 5 nt difference.                                                                                                                                                                        | This study                              |                                                                                                                                       |
| <i>D. piger</i> 3                | 50.0                                     | 19 | GGAACCCTCCGAAAATGAG     | <i>Desulfovibrio piger</i> . There were 3 nt differences to several other <i>Desulfovibrio</i> s.                                                                                                                                                                                                                                | K. Tajima <i>et al.</i> (2001)          |                                                                                                                                       |
| <i>D. piger</i> 4                | 51°C                                     | 23 | GGTGTCTAATCATCATCTAC    | <i>Desulfovibrio piger</i> . 1 nt difference to an uncultured bacterium, and 2 nt to other <i>D.piger</i> . Not all <i>D. piger</i> will bind to this probe                                                                                                                                                                      | This study                              | Clustal as the other <i>D. piger</i> (gil174333 gb M34404.1 DSLRR165) only has 17 bp recognition while this primers seq is 23 bp long |
| Enterobacteriaceae1 <sup>#</sup> | 52.0                                     | 18 | CGTCGCAAGACCAAAGAG      | <i>Escherichia coli</i> , <i>Enterobacter</i> spp., <i>Klebsiella</i> spp., <i>Salmonella</i> spp., <i>Pantoea</i> spp., <i>Citrobacter</i> spp., <i>Serratia marcescens</i> , <i>Shigella</i> spp., <i>Pectobacterium</i> , <i>Leclercia adecarboxylata</i> and <i>Hafnia alvei</i> . All are members of the Enterobacteriaceae | Friedrich <i>et al.</i> (1999)          |                                                                                                                                       |

|                                        |      |    |                           |                                                                                                                                                                                                                                                                                                                                                                                                                                                                                                                                                                                                                                                                                                                                                                                                                                                                                                                                            |                                       |                                                                                                            |
|----------------------------------------|------|----|---------------------------|--------------------------------------------------------------------------------------------------------------------------------------------------------------------------------------------------------------------------------------------------------------------------------------------------------------------------------------------------------------------------------------------------------------------------------------------------------------------------------------------------------------------------------------------------------------------------------------------------------------------------------------------------------------------------------------------------------------------------------------------------------------------------------------------------------------------------------------------------------------------------------------------------------------------------------------------|---------------------------------------|------------------------------------------------------------------------------------------------------------|
| Enterobacteriaceae2                    | 49.6 | 19 | CAGAGATGAGAATGTGCCT       | General <i>Escherichia coli</i> , <i>Salmonella</i> and <i>Shigella</i> probe. 1 nt difference to two <i>E. coli</i> . 2 nt difference to another two <i>E. coli</i> strains and remaining similar sequences were divergent by 3 nt or more.                                                                                                                                                                                                                                                                                                                                                                                                                                                                                                                                                                                                                                                                                               | This study                            |                                                                                                            |
| <i>Enterococcus</i> genus <sup>#</sup> | 52.0 | 16 | AGTCGCGAGGCTAAGC          | <i>Enterococcus faecium</i> , <i>E. faecalis</i> , <i>E. avium</i> , <i>E. hermanniensis</i> , <i>E. gallinarum</i> , <i>E. sulfureus</i> , <i>E. saccharolyticus</i> , <i>E. flavescens</i> , <i>E. dispar</i> , <i>E. pseudoavium</i> , <i>E. raffinosus</i> , <i>E. mundtii</i> , <i>E. malodoratus</i> , <i>E. hirae</i> , <i>E. malodoratus</i> , <i>E. casseliflavus</i> , <i>E. mundtii</i> , <i>E. villorum</i> , <i>E. asini</i> , <i>E. pallens</i> , <i>E. gilvus</i> , <i>E. azikeevi</i> , <i>E. malodoratus</i> . The only other strains with sequence homology were many Wolbachia (they infect invertebrates only), <i>Bacillus carboniphilus</i> (unknown origin) and <i>Carnobacterium alterfunditum</i> (antartic origin) and twenty-three unknown bacteria from the hindgut of the humus-feeding larva. 1 nt difference to all other sequences which were eukaryotic. No other prokaryotic sequences match this probe. | Netherwood <i>et al.</i> (1999)       | The 3' T was removed from the primer to bring the NN temperature into range for this experiment.           |
| <i>E. cecorum</i>                      | 50.0 | 17 | CAATGCGGAGGAAGGTG         | <i>Enterococcus cecorum</i> , <i>E. columbae</i> , <i>Geobacillus jurassicus</i> , <i>Dialister</i> spp., <i>Xylella fastidiosa</i> , <i>Peptococcus niger</i> , five unidentified bacteria from human, pig or chicken GI tracts and more than fifty other uncultured prokaryotic strains.                                                                                                                                                                                                                                                                                                                                                                                                                                                                                                                                                                                                                                                 | This study                            |                                                                                                            |
| <i>E. faecalis</i>                     | 50.6 | 16 | CTCCCGAGTGCTTGCA          | <i>Enterococcus faecalis</i> and three unknown bacteria from swine pit manure. 1 nt difference to <i>Listeria innocua</i> and all remaining similar sequences were eukaryotic.                                                                                                                                                                                                                                                                                                                                                                                                                                                                                                                                                                                                                                                                                                                                                             | This study                            |                                                                                                            |
| <i>E. faecium</i> <sup>#</sup>         | 50.0 | 18 | GCCACTCCTCTTTTTCCG        | <i>Enterococcus faecium</i> , <i>E. canis</i> , <i>E. hirae</i> , <i>E. villorum</i> , <i>E. azikeevi</i> and <i>E. durans</i> . 1 and 2 nt differences only to eukaryotic sequences. The only other prokaryotic sequence with similarities to this probe was <i>Yersinia pestis</i> with 3 nt divergence to this probe.                                                                                                                                                                                                                                                                                                                                                                                                                                                                                                                                                                                                                   | Behr <i>et al.</i> (2000) (probeBase) |                                                                                                            |
| <i>E. coli</i>                         | 54.0 | 19 | CACCGTAGTGCTCGTCAT        | <i>Escherichia coli</i> , <i>Salmonella</i> Typhimurium LT2, <i>Shigella flexneri</i> , <i>Citrobacter freundii</i> , <i>Salmonella enterica</i> and <i>Klebsiella pneumoniae</i> . 2 nt difference to more <i>Salmonella</i> and <i>Klebsiella</i> strains.                                                                                                                                                                                                                                                                                                                                                                                                                                                                                                                                                                                                                                                                               | Marteau <i>et al.</i> (2001)          | The final 2 nts were removed to bring the NN temperature in the range of that selected for the microarray. |
| <i>E. coli</i> O157                    | 49.0 | 24 | CCATAATCATTATTTATTAGAGGGA | <i>Escherichia coli</i> O157. 5 nt difference to all other sequences which were eukaryotic.                                                                                                                                                                                                                                                                                                                                                                                                                                                                                                                                                                                                                                                                                                                                                                                                                                                | Meng <i>et al.</i> (1996)             |                                                                                                            |
| <i>E. biforme</i> 1                    | 50.0 | 16 | CGAAGGCAGGACCGAT          | <i>Eubacterium biforme</i> and fifteen uncultured bacterial sequences from equine, human, sludge and pig sources. 1 nt difference to <i>Bordetella pertussis</i> but no other similar sequence matches.                                                                                                                                                                                                                                                                                                                                                                                                                                                                                                                                                                                                                                                                                                                                    | This study                            |                                                                                                            |

|                               |      |    |                       |                                                                                                                                                                                                                                                                                                                                            |                              |                                                                                                                                                                                                 |
|-------------------------------|------|----|-----------------------|--------------------------------------------------------------------------------------------------------------------------------------------------------------------------------------------------------------------------------------------------------------------------------------------------------------------------------------------|------------------------------|-------------------------------------------------------------------------------------------------------------------------------------------------------------------------------------------------|
| <i>E. biforme 2</i>           | 50.0 | 16 | ACAGAAGAGGACGGCG      | <i>Eubacterium biforme</i> and twenty-two uncultured bacteria, mostly from human and pig GI tracts. 1 nt difference or more to all remaining sequences which were eukaryotic.                                                                                                                                                              | This study                   |                                                                                                                                                                                                 |
| <i>E. biforme 3</i>           | 50.0 | 19 | CGGATAGGTAGCAGACAAG   | <i>Eubacterium biforme</i> and twenty-four unidentified sequences including from pig and human GI tracts. 3 nt to two strains from the gut and the remaining similar sequences were all eukaryotic.                                                                                                                                        | This study                   |                                                                                                                                                                                                 |
| <i>E. biforme 4</i>           | 50.1 | 17 | CGTCTGGTCTGTTGCTG     | <i>Eubacterium biforme</i> and three unidentified bacteria from the human GI tract. 2 nt difference to all remaining sequences which were eukaryotic except <i>Mycoplasma pneumoniae</i> .                                                                                                                                                 | This study                   |                                                                                                                                                                                                 |
| <i>E. cylindroides 1</i>      | 52.0 |    | GGTATGAGGAAGGCATCTTCC | <i>Eubacterium cylindroides</i> and one unidentified bacteria. 4 nt difference to <i>Porphyromonas gingivalis</i> .                                                                                                                                                                                                                        | This study                   | There were four 16S ribosomal gene sequences in the database for this strain, but when clustaled only two matched this probe. The <i>E. cylindroides2</i> probe covers the other two sequences. |
| <i>E. cylindroides 2</i>      | 51.0 | 20 | GGTAGAGAGATCGCATGAAC  | <i>Eubacterium cylindroides</i> . 1 nt difference to eukaryotic sequences and remaining similar sequences had 5 nt divergence or more.                                                                                                                                                                                                     | This study                   | There were four 16S ribosomal gene sequences in the database for this strain, but when clustaled only two matched this probe. The <i>E. cylindroides1</i> probe covers the other two sequences. |
| <i>E. cylindroides clust1</i> | 53.0 | 16 | CGCGGCATTGCTCGTT      | <i>Clostridium innocuum</i> , <i>Eubacterium biforme</i> , <i>E. cylindroides</i> , <i>E. dolichum</i> , <i>E. tortuosum</i> and <i>Streptococcus pleomorphus</i> . There were also many uncultured bacteria from the gut which should bind to this probe. 1 nt difference to many eukaryotic sequences and no further matches.            | Harmsen <i>et al.</i> (2002) | The 3' CA was removed to bring the NN temperature further in the range of that required for the microarray.                                                                                     |
| <i>E. cylindroides clust2</i> | 53.0 | 17 | GCGGCATTGCTCGTTCA     | <i>Eubacterium cylindroides</i> , <i>Clostridium innocuum</i> , <i>Eubacterium biforme</i> , <i>Eubacterium tortuosum</i> , <i>Eubacterium dolichum</i> , <i>Streptococcus pleomorphus</i> and many other uncultured bacteria from the human GI tract. The next nearest sequence similarity were from microorganisms with 2 nt divergence. | Harmsen <i>et al.</i> (2002) | By removing the 5' C from the probe, it brought the NN temperature further in the range of that required for the microarray.                                                                    |

|                                                                                                     |      |    |                    |                                                                                                                                                                                                                                                                                                                                                                                                                                         |                               |                                                                                                                        |
|-----------------------------------------------------------------------------------------------------|------|----|--------------------|-----------------------------------------------------------------------------------------------------------------------------------------------------------------------------------------------------------------------------------------------------------------------------------------------------------------------------------------------------------------------------------------------------------------------------------------|-------------------------------|------------------------------------------------------------------------------------------------------------------------|
| <i>E. formicigenerans</i>                                                                           | 50.0 | 18 | ATGACCGCTTCGTAATGG | <i>Eubacterium formicigenerans</i> , <i>Eubacterium</i> spp, a Clostridiaceae strain and seven unidentified from human or pig GI tracts. One uncultured bacteria with 1 nt difference and the remaining bacteria had 3 nt differences.                                                                                                                                                                                                  | This study                    |                                                                                                                        |
| <i>E. hallii</i>                                                                                    | 51.0 | 17 | TTGCACTGCCACCTACG  | <i>Eubacterium hallii</i> and sixteen <i>Eubacterium</i> spp. from the gut. 1 nt difference to eukaryotic sequences and remaining similar sequences had 2 nt divergence or more, with many being uncultured bacteria from the gut                                                                                                                                                                                                       | Hold <i>et al.</i> (2003)     |                                                                                                                        |
| <i>Eubacterium hallii</i> , <i>Clostridium herbivorans</i> , <i>Clostridium polysaccharolyticum</i> | 52.0 | 18 | CCAGTTACCGGCTCCACC | <i>Eubacterium hallii</i> , <i>Clostridium herbivorans</i> , <i>C. polysaccharolyticum</i> and nine uncultured bacteria from gut sources. Remaining similar sequences had at least 3 nt difference and were eukaryotic or bacteria unlikely to be found in the gut.                                                                                                                                                                     | Harmsen <i>et al.</i> (2002)  |                                                                                                                        |
| <i>E. lentum</i>                                                                                    | 49.9 | 16 | TCCGCATACTCCTCGC   | <i>Eubacterium lentum</i> , 1 nt difference to <i>Neurospora crassa</i> and a single eukaryotic sequence. No other similar sequences.                                                                                                                                                                                                                                                                                                   | This study                    |                                                                                                                        |
| <i>E. limosum</i>                                                                                   | 47.0 | 18 | CTCATTGGGTACCGTCAT | <i>Eubacterium limosum</i> , <i>E. callanderi</i> , <i>Butyribacterium methylotrophicum</i> and two uncultured bacteria from extreme environments. 1 nt difference to bacteria from a lake sediment, <i>Pseudoramibacter</i> ,an uncultured bacteria from a human subgingival plaque and the pig intestine. 2 nt difference to <i>Oscillatoria amphigranulata</i> , <i>Eubacterium aggregans</i> and two uncultured human gut bacteria. | This study                    |                                                                                                                        |
| <i>E. moniliforme</i>                                                                               | 51.0 | 18 | CCGCTAATCCATTTCCCG | <i>Eubacterium moniliforme</i> and five uncultured bacteria from the human gut. 2 nt difference to fifteen bacteria including <i>Actinobacterium</i> (non-gut source), <i>Actinomycetes</i> and <i>Clostridium neonatale</i> . 3 nt difference to all remaining sequences.                                                                                                                                                              | Schwartz <i>et al.</i> (2002) |                                                                                                                        |
| <i>E. multiforme</i>                                                                                | 49.0 | 18 | GTCCTTCATGCGAAGGT  | <i>Eubacterium multiforme</i> and five Clostridia from earthworm intestines. 1 nt difference to seven Bacilli from non-gut sources. 2 nt difference to many more Bacilli, again all from non-gut sources. Remaining similar sequences had 3 nt divergence.                                                                                                                                                                              | Schwartz <i>et al.</i> (2002) |                                                                                                                        |
| <i>E. ramulus</i>                                                                                   | 49.5 | 17 | ACGACTACTGACGCTGA  | <i>Eubacterium ramulus</i> and thirteen unidentified bacteria, six of which were from the rumen, human or earthworm GI tracts. 1 nt difference to two unidentified strains and 3 nt difference to all remaining similar hits which were uncultured soil bacteria.                                                                                                                                                                       | This study                    |                                                                                                                        |
| <i>E. rectale 1</i>                                                                                 | 51.0 | 16 | GCTCGGCTTCACAGCT   | <i>Eubacterium rectale</i> and six uncultured bacteria from the human gut. All remaining similar hits had at least 1 nt difference and were eukaryotic.                                                                                                                                                                                                                                                                                 | Kageyama and Benno (2001)     | The ATTT from the 5' end of the primer was removed to bring it into the temperature range required for the microarray. |

|                          |                                          |    |                      |                                                                                                                                                                                                                                                                                                                                                       |                                        |                                                                                                                         |
|--------------------------|------------------------------------------|----|----------------------|-------------------------------------------------------------------------------------------------------------------------------------------------------------------------------------------------------------------------------------------------------------------------------------------------------------------------------------------------------|----------------------------------------|-------------------------------------------------------------------------------------------------------------------------|
| <i>E. rectale</i> 2      | 53.0                                     | 20 | ATTGCTTCTCGGTGCCGT   | <i>Eubacterium rectale</i> and nine unknown bacteria from the human gut. 2 nt difference to <i>Zygosaccharomyces bailii</i> . All remaining similar sequences had at least 3 nt divergence from the probe and were eukaryotic.                                                                                                                        | Kageyama and Benno (2001)              | The 5' and 3' C was removed from the probe to bring the NN temperature nearer to the range required for the microarray. |
| <i>E. ruminantium</i> 1  | 47.5                                     | 16 | CCGAGACTGAGGAAGC     | <i>Eubacterium ruminantium</i> and remaining identical sequences were all eukaryotic. 1 nt difference or more to many eukaryotic sequences.                                                                                                                                                                                                           | This study                             |                                                                                                                         |
| <i>E. ruminantium</i> 2  | 48.4                                     | 21 | GCTTCTGAAGAATCATTGAA | <i>Eubacterium ruminantium</i> and eleven unidentified rumen bacteria. 1 nt difference to six other unidentified rumen bacteria and 3 nt to two more. Remaining similar sequences had 5 nt or more divergence.                                                                                                                                        | This study                             |                                                                                                                         |
| <i>E. siraeum</i>        | 50.1                                     | 19 | CTAATGAGACTGCCGTTGA  | <i>Eubacterium siraeum</i> and twenty-seven uncultured bacteria including from chicken, pig, termite and human GI tracts. 2 nt difference to two uncultured bacteria and eukaryotic sequences. 3 nt difference to many uncultured bacteria.                                                                                                           | This study                             |                                                                                                                         |
| <i>E. tortuosum</i>      | 47.0                                     | 20 | GGTAACCTACCCATGTAAC  | <i>Eubacterium tortuosum</i> . The next most similar sequences had 2 and 3 nt different from the probe and all were eukaryotic                                                                                                                                                                                                                        | Kageyama and Benno (2001)              |                                                                                                                         |
| <i>E. ventriosum</i>     | 50.0                                     | 16 | CGAAGGTGGAGCCGAT     | <i>Eubacterium ventriosum</i> , <i>Streptomyces coelicolor</i> , <i>Rhodopseudomonas palustris</i> , <i>Mesorhizobium loti</i> and eighteen uncultured bacteria from chicken, rat, goat or landfill sources. 1 nt difference to three uncultured bacteria from the human gut and all remaining similar bacteria were unlikely to be found in the gut. | This study                             |                                                                                                                         |
| <i>Fibrobacter</i>       | 58.0                                     | 17 | CCGCGCGTTGGCACGG     | <i>Fibrobacter succinogenes</i> , <i>F. intestinalis</i> , <i>Mycobacterium tuberculosis</i> and <i>M. bovis</i> . 1 nt difference to <i>Rhodopseudomonas palustris</i> , <i>Anopheles gambiae</i> , <i>Haemaphysalis humerosa</i> and <i>Pseudomonas synxantha</i> . No other similar sequence matches.                                              | Lin and Stahl (1995) (probeBase)       | 100% coverage                                                                                                           |
| Firmicutes1 <sup>#</sup> | 49.0                                     | 18 | CGGAAGATTCCCTACTGC   | Firmicutes (Gram-positive bacteria with low G+C content). Use in eqimolar amounts                                                                                                                                                                                                                                                                     | Meier <i>et al.</i> (1999) (probeBase) | 51.2% total coverage.                                                                                                   |
| Firmicutes2 <sup>#</sup> | 49.0                                     | 18 | CGGAAGATTCCCTACTGC   | Firmicutes (Gram-positive bacteria with low G+C content). Use in eqimolar amounts                                                                                                                                                                                                                                                                     | Meier <i>et al.</i> (1999) (probeBase) | 51.2% total coverage.                                                                                                   |
| Firmicutes3 <sup>#</sup> | 47. Probe base described NN temp as 50°C | 18 | TGGAAGATTCCCTACTGC   | Firmicutes (Gram-positive bacteria with low G+C content). Used in eqimolar amounts                                                                                                                                                                                                                                                                    | Meier <i>et al.</i> (1999) (probeBase) | 51.2% total coverage.                                                                                                   |

|                        |      |    |                          |                                                                                                                                                                                                                                                                                                                                                                                                                                                                                                                                                                                                                                                                                               |                             |                                                                                             |
|------------------------|------|----|--------------------------|-----------------------------------------------------------------------------------------------------------------------------------------------------------------------------------------------------------------------------------------------------------------------------------------------------------------------------------------------------------------------------------------------------------------------------------------------------------------------------------------------------------------------------------------------------------------------------------------------------------------------------------------------------------------------------------------------|-----------------------------|---------------------------------------------------------------------------------------------|
| <i>F. canadensis</i> 1 | 50.2 | 18 | TATACAGTCGGCGGCTAA       | <i>Flexibacter canadensis</i> . 3 nt difference to the only other prokaryote hit; <i>Clostridium spinosporum</i> .                                                                                                                                                                                                                                                                                                                                                                                                                                                                                                                                                                            | This study                  | The probe covered all strains in the NCBI database whose sequence was of sufficient length. |
| <i>F. canadensis</i> 2 | 50.4 | 18 | GTGTAAGTACGCTGAGG        | <i>Flexibacter canadensis</i> and four uncultured bacteria from non-gut sources. 1 nt difference to over fifty Bacilli and Lactobacilli.                                                                                                                                                                                                                                                                                                                                                                                                                                                                                                                                                      | This study                  |                                                                                             |
| <i>F. necrophorum</i>  | 50.1 | 18 | TACGAACGGAGCAGAGAT       | <i>Fusobacterium necrophorum</i> . 1 nt difference to three eukaryotic sequences. All remaining similar sequences were divergent by 3 nt and were eukaryotic.                                                                                                                                                                                                                                                                                                                                                                                                                                                                                                                                 | This study                  | The probe covered all strains in the NCBI database whose sequence was of sufficient length. |
| <i>F. prausnitzii</i>  | 49.7 | 16 | GGCATCGGGTAGAGGG         | <i>Facealibacterium prausnitzii</i> , six uncultured <i>Fusobacterium</i> spp. from human GI tracts and four further uncultured bacteria from human GI tracts. 1 nt difference to two uncultured bacteria and no other similar sequence matches.                                                                                                                                                                                                                                                                                                                                                                                                                                              | This study                  |                                                                                             |
| <i>H. pylori</i>       | 49.9 | 20 | CAGGATGCTAAATTGGCTAC     | <i>Helicobacter pylori</i> , 2 nt difference to four other <i>Helicobacter</i> spp. and all remaining sequences had at least 4 nt difference to the probe.                                                                                                                                                                                                                                                                                                                                                                                                                                                                                                                                    | This study                  |                                                                                             |
| <i>L. acidophilus</i>  | 48.0 | 19 | GCTGAACCAACAGATTCAC      | <i>Lactobacillus acidophilus</i> but possibly too specific as only three strains (which have more than 1000 nt of sequence) match the probe out of seven in total. Also two uncultured bacteria from the human GI tract. 1 nt difference to one <i>L. plantarum</i> from an unknown source. 2 nt difference to two human gut bacteria and remaining similar sequence matches were divergent by at least 3 nt or more to eukaryotic sequences.                                                                                                                                                                                                                                                 | Walter <i>et al.</i> (2000) |                                                                                             |
| Lactobacillales        | 57.0 | 24 | CACCGCTACACATGRAGTTCCACT | General lactobacilli, streptococci and enterococci probe                                                                                                                                                                                                                                                                                                                                                                                                                                                                                                                                                                                                                                      | This study                  |                                                                                             |
| Lactobacilli           | 50.0 | 18 | GCAAGTCTGATGGAGCAA       | General lactobacillus probe; <i>Lactobacillus paracasei</i> , <i>L. suntoryeus</i> , <i>L. delbrueckii</i> , <i>L. ultunensis</i> , <i>L. kalixensis</i> , <i>L. salivarius</i> , <i>L. gasseri</i> , <i>L. casei</i> , <i>L. rhamnosus</i> , <i>L. delbrueckii</i> , <i>L. zaeae</i> , <i>L. helveticus</i> , <i>L. crispatus</i> , <i>L. iners</i> , <i>L. saerimmeri</i> , <i>Pediococcus acidilactici</i> , <i>P. pentosaceus</i> and many uncultured bacteria and (probably Lactobacilli). 1 nt difference to three <i>Lactobacillus</i> spp. and remaining sequences had 2 nt difference to lactobacilli including <i>L. plantarum</i> , <i>L. fermentum</i> and <i>L. helveticus</i> . | This study                  |                                                                                             |

|                                  |      |    |                         |                                                                                                                                                                                                                                                                                                                                                                                                                                                                                                                                                |                               |  |
|----------------------------------|------|----|-------------------------|------------------------------------------------------------------------------------------------------------------------------------------------------------------------------------------------------------------------------------------------------------------------------------------------------------------------------------------------------------------------------------------------------------------------------------------------------------------------------------------------------------------------------------------------|-------------------------------|--|
| <i>L. brevis</i>                 | 50.1 | 17 | TCAGCCGTCTAAGGTGG       | <i>Lactobacillus brevis</i> , <i>L. perolens</i> , <i>L. hetero</i> , <i>L. acetotolerans</i> , <i>L. spicheri</i> , <i>Allisonella histaminiformans</i> , <i>Anaerovibrio glycerini</i> and six uncultured bacteria from equine or rumen sources. 1 nt difference to many other bacteria which included <i>Lactobacilli</i> , <i>Pediococci</i> and unculturable especially from the rumen.                                                                                                                                                   | This study                    |  |
| <i>L. casei</i> <sup>#</sup>     | 50.0 | 20 | TGCACTGAGATTCGACTTAA    | <i>L. casei</i> . 4 and 5 nt difference to the next most similar bacterial sequences ( <i>Rhizobium</i> ).                                                                                                                                                                                                                                                                                                                                                                                                                                     | Ward <i>et al.</i> , (1999)   |  |
| <i>L. crispatus</i>              | 50.0 | 20 | GTAATGACGTTAGGAAAGCG    | <i>Lactobacillus crispatus</i> , one <i>L. jensenii</i> bacteria, one <i>L. gasseri</i> and five unknown from human and chicken sources. 3 nt difference to eukaryotic sequences and two <i>L. crispatus</i> species.                                                                                                                                                                                                                                                                                                                          | Walter <i>et al.</i> , (2000) |  |
| <i>L. jensenii</i> 1             | 49.9 | 20 | AGAAGTTCTTCGGAATGGAA    | <i>Lactobacillus jensenii</i> and <i>L. psittaci</i> . 2 nt difference to eukaryotic sequences only. Next similar bacterial sequence match was 3 nt.                                                                                                                                                                                                                                                                                                                                                                                           | This study                    |  |
| <i>L. jensenii</i> 2             | 47.0 | 18 | GCTACTTTCGCATGAAAG      | <i>Lactobacillus jensenii</i> and five uncultured human vaginal <i>Lactobacillus</i> spp. 1 nt difference to <i>Lactobacillus psittaci</i> and 2 nt to nine strains including <i>Enterococcus faecalis</i> and <i>Eubacterium moniliforme</i> .                                                                                                                                                                                                                                                                                                | This study                    |  |
| <i>L. johnsonii</i> <sup>#</sup> | 49.0 | 23 | GATGATTTTAGTTCTTGCACTAA | <i>Lactobacillus johnsonii</i> , one <i>Lactobacillus</i> spp. from yoghurt and 3 unknown bacteria from the pig intestine. 1 nt difference to one uncultured bacterium and remaining similar sequence hits were all eukaryotic. Next nearest bacterial sequence match had 6 nt differences.                                                                                                                                                                                                                                                    | Ventura <i>et al.</i> (2002)  |  |
| <i>L. mucosae</i>                | 50.1 | 17 | CTGATGGAGCAACACCG       | <i>Lactobacillus mucosae</i> , <i>L. antrumi</i> , <i>L. gastricus</i> , <i>L. vaginalis</i> , <i>L. fermentum</i> , <i>L. oris</i> , <i>L. suebicus</i> , <i>L. reuteri</i> , <i>L. pontis</i> , <i>L. panis</i> , <i>L. durianis</i> , <i>L. colehominis</i> , <i>L. cellobiosus</i> and many unknown bacteria isolated from the human stomach, mouth and vagina plus chicken, food and the rumen. 1 nt difference to many eukaryotic sequences and 2 nt divergence to further eukaryotes and prokaryotes unlikely to be present in the gut. | This study                    |  |
| <i>L. plantarum</i>              | 49.9 | 21 | AACGAACCTCTGGTATTGATTG  | <i>Lactobacillus plantarum</i> , <i>L. pentosus</i> (a close relative to <i>L. plantarum</i> ) and <i>L. arizonensis</i> . 1 nt internal difference to six uncultured bacteria. Remaining bacterial sequences had 4 nt or more difference to this probe.                                                                                                                                                                                                                                                                                       | This study                    |  |
| <i>L. amylovorus</i>             | 50.1 | 17 | TGTTGTCAGTTGCCAGC       | <i>L. agilis</i> , <i>L. salivarius</i> , <i>L. equi</i> , <i>L. saerimmeri</i> and fourteen uncultured bacteria from pig, chicken and horse GI tracts. 2 nt difference to fifteen bacteria including <i>Lactobacillus</i> spp.                                                                                                                                                                                                                                                                                                                | This study                    |  |

|                                                                                          |                                          |    |                        |                                                                                                                                                                                                                                                                                                                              |                                         |                                     |
|------------------------------------------------------------------------------------------|------------------------------------------|----|------------------------|------------------------------------------------------------------------------------------------------------------------------------------------------------------------------------------------------------------------------------------------------------------------------------------------------------------------------|-----------------------------------------|-------------------------------------|
| <i>L. lactis</i>                                                                         | 48.4                                     | 21 | TGCTAGAAATAGGGAATGATTC | <i>Leuconostoc lactis</i> , <i>L. garlicum</i> , two <i>Leuconostoc</i> spp. from the human gut and one uncultured bacteria from cheese. 1 nt difference to an uncultured bacteria and <i>L. argentinum</i> . 2 nt divergence to further <i>Leuconostoc</i> spp.                                                             | This study                              |                                     |
| <i>L. minutus</i>                                                                        | 50.1                                     | 17 | AGGCGGTCTGTTAGGTC      | <i>Lactobacillus (Atopobium) minutus</i> , <i>A. vaginae</i> , <i>A. parvulum</i> , <i>A. rimae</i> , <i>Pantoea toletana</i> , <i>Eubacterium fossler</i> . Next nearest sequence homology was 2 nt difference and all sequences were eukaryotic.                                                                           | This study                              |                                     |
| <i>L. monocytogenes</i>                                                                  | 47.6                                     | 17 | ATAAAGTGTGGCGCATG      | <i>Listeria monocytogenes</i> and one <i>Listeria</i> spp. 2 nt difference to all remaining sequences which were eukaryotic.                                                                                                                                                                                                 | This study                              |                                     |
| <i>M. hypermegale</i> 1                                                                  | 50.0                                     | 21 | GCAACATTTTGAATAAGGGTG  | <i>Megamonas hypermegale</i> and one unknown bacteria from the caecum of a chicken. 3 nt difference to <i>Neurospora crassa</i> and 4 nt divergence to all remaining bacterial sequences likely to cross hybridise.                                                                                                          | This study                              |                                     |
| <i>M. hypermegale</i> 2                                                                  | 50.3                                     | 18 | AGAGATGACCGCATGGAT     | <i>Megamonas hypermegale</i> and nine uncultured bacteria from the chicken gut. 2 nt difference to three uncultured bacteria. Remaining bacterial sequences had at least 3 nt divergence.                                                                                                                                    | This study                              |                                     |
| Methanogens                                                                              | 56 (probeBase described NN temp as 57°C) | 22 | CTTGTCAGGTTCCATCTCCG   | <i>Methanobacterium</i> spp., <i>Methanobrevibacter</i> spp., <i>Methanosphaera</i> spp. The probe is very comprehensive. 1 nt difference to <i>Methanobrevibacter</i> spp. and remaining similar sequence hits had 3 nt difference to other methanogens.                                                                    | Raskin <i>et al.</i> (1994) (probeBase) |                                     |
| <i>Methanobacterium</i> spp., <i>Methanobrevibacter</i> spp., <i>Methanosphaera</i> spp. | 57 (ProbeBase described NN temp as 59°C) | 22 | TACCGTCGTCCTCCTCCTC    | Specific for <i>Methanobacterium</i> spp., <i>Methanobrevibacter</i> spp., <i>Methanosphaera</i> spp. and many uncultured rumen bacteria. 1 nt difference to ten archaeon cultured from many sources including the human gut. Remaining sequences had at least 3 nt difference to the probe and were mostly eukaryotic.      | Raskin <i>et al.</i> (1994) (probeBase) | Not ordered for expanded microarray |
| <i>Methanobrevibacter smithii</i>                                                        | 50.0                                     | 19 | ATAGGAGGAAGGAGTGGAC    | <i>Methanobrevibacter smithii</i> , <i>M. gottschalkii</i> , <i>M. woesei</i> , <i>M. thaueri</i> (all from faeces of humans and animals), twelve unknown bacteria from humans, the rumen contents of a yak and sheep. 2 nt difference to seven eukaryotic sequences. 3 nt difference to many <i>Methanobrevibacter</i> spp. | This study                              | Not ordered for expanded microarray |
| <i>Methanosphaera stadtmanii</i>                                                         | 49.5                                     | 16 | CCTGGCGGAAGCTACT       | <i>Methanosphaera stadtmanii</i> . Remaining 16S ribosomal gene sequences had 1 nt difference to this probe and all were eukaryotic.                                                                                                                                                                                         | This study                              | Not ordered for expanded microarray |
| Nitrospirae                                                                              | 63 (ProbeBase described NN temp as 64°C) | 21 | CGCCTTCGCCACCGCCTTCC   | Too many 16S ribosomal gene target matches to define full probe specificity using BLASTn                                                                                                                                                                                                                                     | Daims <i>et al.</i> (1999) (probeBase)  | 85% total coverage                  |



|                           |                                          |    |                         |                                                                                                                                                                                                                                                                                                 |                                         |                      |
|---------------------------|------------------------------------------|----|-------------------------|-------------------------------------------------------------------------------------------------------------------------------------------------------------------------------------------------------------------------------------------------------------------------------------------------|-----------------------------------------|----------------------|
| <i>M. smegmatis</i>       | 49.9                                     | 16 | TCGCATGGCCTGGTAG        | <i>Mycobacterium smegmatis</i> , <i>M. flavescens</i> and <i>M. marinum</i> . All remaining similar sequences were eukaryotic.                                                                                                                                                                  | This study                              |                      |
| <i>O. gallinifaecis</i> 1 | 49.5                                     | 18 | CCTATACGACCGAGAGGT      | <i>Ochrobactrum gallinifaecis</i> . 2 nt difference to <i>Aquamicrobium defluvium</i> and 3 nt sequence divergence to many uncultured bacteria.                                                                                                                                                 | This study                              |                      |
| <i>O. gallinifaecis</i> 2 | 43.6                                     | 18 | ACCAATCACTAGGGAATA      | <i>Ochrobactrum gallinifaecis</i> . 2 nt or greater difference to all other sequences which were eukaryotic.                                                                                                                                                                                    | This study                              |                      |
| <i>O. formigenes</i>      | 48.7                                     | 19 | ACAACCAGTCGAAAGATTG     | <i>Oxalobacter formigenes</i> and four uncultured bacteria. 2 nt difference to many bacteria.                                                                                                                                                                                                   | This study                              |                      |
| <i>P. aerogenes</i>       | 50.1                                     | 18 | ATGAGGAAGGCGGTTAGT      | <i>Pasteurella aerogenes</i> , <i>Haemophilus paracuniculus</i> , <i>Actinobacillus capsulatus</i> (all from the <i>Pasteurella</i> genus) and one uncultured bacteria from the pig gut. 1 nt difference to two eukaryotic sequences. Next most similar bacterial sequence had 3 nt divergence. | This study                              |                      |
| <i>P. pentosaceus</i>     | 50.2                                     | 23 | GATTATGACGTACTTGTACTGAT | <i>Pediococcus pentosaceus</i> . 4 nt difference to another <i>P. pentosaceus</i> . 6 nt divergence to <i>Staphylococcus epidermidis</i> .                                                                                                                                                      | This study                              |                      |
| <i>P. anaerobius</i>      | 48.7                                     | 17 | CGGCATCGTAGATATAT       | <i>Peptostreptococcus anaerobis</i> , <i>Peptostreptococcus</i> spp. and two uncultured bacteria from manure and the pig GI tract. 1 nt difference to eukaryotic sequences and <i>Shewanella oneidensis</i> . All bacteria with 2 nt divergence or greater were unlikely to be found in gut.    | This study                              |                      |
| <i>P. productus</i>       | 50.2                                     | 17 | CAGCGATGTTGAGCGAA       | <i>Ruminococcus (Peptostreptococcus) productus</i> , <i>Clostridium coccoides</i> and 1 unknown <i>Clostridium</i> spp.. 1 nt difference to <i>Bifidobacterium longum</i> . 2 nt difference to <i>Salmonella</i> spp. and <i>Sinorhizobium meliloti</i> .                                       | This study                              |                      |
| Acidobacteria1            | 45 (ProbeBase says 47)                   | 17 | GCAGTGGGAATTGTTTC       | The Acidobacteria group a phylum and many uncultured bacteria.                                                                                                                                                                                                                                  | Ludwig <i>et al.</i> (1997) (probeBase) | 44.2% total coverage |
| Acidobacteria2            | 54 (ProbeBase says 55)                   | 18 | AAGCGGCATCCTGGACC       | The Acidobacteria group a phylum and many uncultured bacteria.                                                                                                                                                                                                                                  | Ludwig <i>et al.</i> (1997) (probeBase) | 38.4% total coverage |
| Planctomycetales1         | 47.0                                     | 18 | GACTTGCATGCCTAATCC      | Planctomycetales                                                                                                                                                                                                                                                                                | Neef <i>et al.</i> (1998) (probeBase)   | 92.6% total coverage |
| Planctomycetales2         | 54.0                                     | 19 | GCCTTGCGACCATACTCCC     | Planctomycetales                                                                                                                                                                                                                                                                                | Neef <i>et al.</i> (1998) (probeBase)   | 82.7% total coverage |
| Planctomycetales3         | 54 (ProbeBase described NN temp as 55°C) | 18 | GCAGCCACCCGTAGGTGT      | Planctomycetales                                                                                                                                                                                                                                                                                | Daims <i>et al.</i> (1999) (probeBase)  | 75.3% total coverage |
| <i>P. gingivalis</i>      | 50.2                                     | 16 | GTTTCAGCCTGCCGTTG       | <i>Porphyromonas gingivalis</i> and <i>P. gulae</i> . 1 nt difference to <i>Neurospora crassa</i> and all remaining sequence matches were eukaryotic.                                                                                                                                           | This study                              |                      |

|                        |                                                        |    |                     |                                                                                                                                                                                                                                                                                                                                                                                                                                                                                                                        |                                          |                                                                                  |
|------------------------|--------------------------------------------------------|----|---------------------|------------------------------------------------------------------------------------------------------------------------------------------------------------------------------------------------------------------------------------------------------------------------------------------------------------------------------------------------------------------------------------------------------------------------------------------------------------------------------------------------------------------------|------------------------------------------|----------------------------------------------------------------------------------|
| <i>P. macacae</i>      | 49.9                                                   | 19 | ACATATCCTGTCACAAGGC | <i>Porphyromonas macacae</i> . 1 nt difference to eukaryotic sequences. 4 nt difference to <i>Saccharomyces cerevisiae</i> and all remaining similar sequence matches were eukaryotic.                                                                                                                                                                                                                                                                                                                                 | This study                               |                                                                                  |
| <i>P. buccalis</i>     | 49.9                                                   | 18 | CTGTTCCGCCTTTTTGTG  | <i>Prevotella buccalis</i> . 4 nt difference to the next nearest bacteria sequence match which was <i>Geobacter sulfurreducens</i> .                                                                                                                                                                                                                                                                                                                                                                                   | This study                               | Only example of this strain in the database                                      |
| <i>P. corporis</i>     | 49.3                                                   | 17 | CGGCATTAAGTGCTTGC   | <i>Prevotella corporis</i> and <i>Prevotella</i> spp. human oral clone. 2 and 3 nt difference to all remaining similar sequences which were eukaryotic.                                                                                                                                                                                                                                                                                                                                                                | This study                               | Only one example of this strain in the database                                  |
| <i>P. enoeca</i> 1     | 49.9                                                   | 18 | ATGTAATCCGAAGCAGGC  | <i>Prevotella enoeca</i> . 1 nt difference and more to all other sequences which were eukaryotic.                                                                                                                                                                                                                                                                                                                                                                                                                      | This study                               | Only one <i>Prevotella enoeca</i> 16S ribosomal gene was present in the database |
| <i>P. enoeca</i> 2     | 52.3                                                   | 18 | TGACTGACGCTGATGCTC  | <i>Prevotella enoeca</i> and an uncultured bacteria from the pig gut. 1 nt divergence to <i>P. buccalis</i> . Many <i>Prevotella</i> spp. and unknown bacteria had 2 nt difference to this probe.                                                                                                                                                                                                                                                                                                                      | This study                               | Only one <i>Prevotella enoeca</i> 16S ribosomal gene was present in the database |
| <i>P. ruminicola</i>   | 42 (53°C annealing temp used by Tajima <i>et al.</i> ) | 18 | GGTTATCTTGAGTGAGTT  | <i>Prevotella ruminicola</i> and thirty uncultured bacteria or <i>Prevotella</i> spp. 1 and 2 nt difference to all other sequences which were eukaryotic.                                                                                                                                                                                                                                                                                                                                                              | Tajima <i>et al.</i> (2001)              |                                                                                  |
| <i>P. granulosum</i>   | 50.5                                                   | 18 | CTCCTGCTGCATGGTGGG  | <i>Propionibacterium granulosum</i> , <i>P. acnes</i> , <i>Actinomyces slackii</i> , <i>A. israelii</i> , <i>Acidithiobacillus thioox</i> (all Actinomyces group), <i>Mycobacterium chitae</i> and many uncultured bacteria from human and rumen sources. 1 nt difference to <i>A. slackii</i> , <i>Streptomyces coelicolor</i> and two uncultured Actinobacteria. 2 nt difference to an <i>Actinomyces</i> spp. oral clone, <i>Bordetella pertussis</i> , <i>Bordetella</i> spp. and a few other uncultured bacteria. | This study                               |                                                                                  |
| <i>P. aeruginosa</i> 1 | 51.0                                                   |    | GGTAACCGTCCCCCTTGC  | <i>Pseudomonas aeruginosa</i> , <i>Cellvibrio mixtus</i> , <i>C. fulvus</i> , <i>C. vulgaris</i> (all part of Pseudomonad family), <i>P. thermotolerans</i> , <i>P. anguilliseptica</i> , <i>P. citronellolis</i> , <i>P. resinovorans</i> , <i>P. thermaerum</i> , <i>P. alcaligenes</i> , <i>P. anguilliseptica</i> , many uncultured bacteria and one Bacteroidetes spp.. 1 nt difference to three unknowns from non-gut sources and all remaining similar sequence hits had 3 nt divergence or more.               | Hogardt <i>et al.</i> (2000) (probeBase) |                                                                                  |

|                                    |      |    |                     |                                                                                                                                                                                                                                                                                                                                                                                                                                                                                                             |                           |                                                                                                                                                                |
|------------------------------------|------|----|---------------------|-------------------------------------------------------------------------------------------------------------------------------------------------------------------------------------------------------------------------------------------------------------------------------------------------------------------------------------------------------------------------------------------------------------------------------------------------------------------------------------------------------------|---------------------------|----------------------------------------------------------------------------------------------------------------------------------------------------------------|
| <i>Pseudomonas</i> general probe   | 50.0 | 16 | CTTCGGACCTCAGCT     | This probe covers a large number of Pseudomonads including <i>P. aeruginosa</i> . Also matches sequences from <i>Teredinibacter turnerae</i> , <i>Chryseomonas luteola</i> , <i>Lucinoma aequizonata</i> , <i>Azotobacter beijerinck</i> , <i>Acinetobacter baumannii</i> , <i>Rhodococcus erythropolis</i> , <i>Flavobacterium lutescens</i> and many unknown bacteria of which only three came from the equine gut. 1 nt difference to several other bacteria from non-mammal gut sources.                | This study                |                                                                                                                                                                |
| <i>R. cecicola</i>                 | 50.1 | 18 | CTTAGTAGCCAGCGGTTC  | <i>Roseburia cecicola</i> and sixteen uncultured bacteria from human, equine and goat GI tracts. Twenty-five microorganisms with 1 nt difference including <i>Clostridium morbi</i> , <i>Ruminococcus schinkii</i> , <i>Eubacterium oxidoreducens</i> , <i>C. herbivorans</i> (All from rumen or pig intestine) and the remaining uncultured bacteria were mostly from gut sources. Twenty sequences with 2 nt difference (all uncultured) and remaining sequence similarities had 3 nt divergence or more. |                           |                                                                                                                                                                |
| <i>R. intestinalis</i> 1           | 51.0 | 18 | TAGTAGCCAGCGGGTAAG  | <i>Roseburia intestinalis</i> and three uncultured bacteria from the human and pig GI tracts. 1 nt difference to uncultured strains from the termite gut and <i>Aspergillus parasiticus</i> . Five unknown bacteria with 2 nt difference isolated from the termite gut and remaining similar sequences were eukaryotic and had 3 nt difference.                                                                                                                                                             | Hold <i>et al.</i> (2003) | The 3' C of this primer was removed and replaced with a T at the 5' end. This brought down the NN temperature to within the range required for the microarray. |
| <i>R. intestinalis</i> 2           | 50.1 | 16 | CCAACCGCAAGGAGGA    | <i>Roseburia intestinalis</i> , <i>Peptostreptococcus</i> spp., <i>P. anaerobius</i> , <i>Leptotrichia</i> spp., human oral clones and nine uncultured bacteria from equine, rumen and human GI tracts. 1 nt difference to many bacteria, most of which were uncultured from the chicken and human gut.                                                                                                                                                                                                     | This study                |                                                                                                                                                                |
| <i>R. intestinalis</i> sub-cluster | 50.0 | 18 | TTCCAATGCAGTACCGGG  | <i>Roseburia intestinalis</i> , two <i>Eubacterium</i> spp., two <i>E. rectale</i> spp., a single <i>Roseburia</i> spp., <i>R. cecicola</i> , <i>E. rectale</i> and <i>E. ramulus</i> . 2 nt difference to one uncultured bacteria and 3 nt difference to several other strains which are not found in the gut.                                                                                                                                                                                             | Hold <i>et al.</i> (2003) |                                                                                                                                                                |
| <i>R. albus</i>                    | 52.0 | 19 | CCTCCTTGCGGTTAGAACA | <i>Ruminococcus albus</i> and two uncultured bacteria from the rumen contents of a yak. 2 nt difference to an uncultured <i>Eubacterium</i> spp. from a non-gut source. 3 nt difference to many bacteria including many <i>Burkholderia</i> spp., <i>Nitrosospora</i> spp., <i>Acinetobacter johnsonii</i> , <i>Peptostreptococcus</i> spp. and <i>Clostridium sporosphaeroides</i> .                                                                                                                       | Wang <i>et al.</i> (1997) |                                                                                                                                                                |

|                                            |      |    |                         |                                                                                                                                                                                                                                                                                                                                                                                                                                                           |                              |                                                                                                        |
|--------------------------------------------|------|----|-------------------------|-----------------------------------------------------------------------------------------------------------------------------------------------------------------------------------------------------------------------------------------------------------------------------------------------------------------------------------------------------------------------------------------------------------------------------------------------------------|------------------------------|--------------------------------------------------------------------------------------------------------|
| <i>R. albus</i> & <i>R. flavefaciens</i> 1 | 56.0 | 19 | AAAGCCCAGTAAGCCGGCC     | <i>Ruminococcus albus</i> , <i>R. flavefaciens</i> , thirty uncultured <i>Ruminococcus</i> spp. from the human, rat, rumen, pig and chicken GI tracts plus water. 3 nt difference to the next most similar sequences which were all eukaryotic except one <i>Bacillus</i> spp. and <i>Xanthomonas campestris</i> .                                                                                                                                        | Harmsen <i>et al.</i> (2002) |                                                                                                        |
| <i>R. albus</i> & <i>R. flavefaciens</i> 2 | 50.0 | 20 | GAAGTAGAGGTAAGCGGAAT    | <i>Ruminococcus flavefaciens</i> , <i>R. albus</i> , five <i>Ruminococcus</i> spp. and twenty-eight unknown bacteria from a human Crohn's disease patient, cow, rumen or pig GI tracts. 1 nt difference to eleven uncultured bacteria from the pig, rat, human and termite intestines. Remaining similar sequences had 3 nt or more difference.                                                                                                           | This study                   |                                                                                                        |
| <i>R. bromii</i>                           | 50.1 | 23 | GATTTCCTCGGAATGAATTTGAT | <i>Ruminococcus bromii</i> , two <i>Ruminococcus</i> spp., four unknown bacteria from the human gut and three unknown bacteria. 1 nt difference to an uncultured bacteria from the pig intestine and 2 nt divergence to an uncultured bacteria from the rat intestine. Remaining similar sequences had 4 nt differences.                                                                                                                                  | This study                   |                                                                                                        |
| <i>R. callidus</i>                         | 51.0 | 20 | CGCATAACATCATGGATTTCG   | <i>Ruminococcus callidus</i> , two uncultured <i>Ruminococcus</i> spp., from the human gut and two uncultured bacteria from the human gut. 4 nt difference to the next nearest sequences which were all eukaryotic.                                                                                                                                                                                                                                       | Wang <i>et al.</i> (1997)    |                                                                                                        |
| <i>R. flavefaciens</i>                     | 49.0 | 20 | GGACGATAATGACGGTACTT    | <i>Ruminococcus flavefaciens</i> and ten uncultured bacteria from gut sources. 1 nt difference to twenty uncultured bacteria including from rumen and waste sites, <i>Clostridium botulinum</i> and <i>R. callidus</i> . Remaining sequence similarities were divergent by 2 nt or more.                                                                                                                                                                  | Tajima <i>et al.</i> (2001)  |                                                                                                        |
| <i>R. lactaris</i>                         | 50.0 | 19 | ACGCAATAAGTAGTCCACC     | <i>Ruminococcus lactaris</i> , <i>R. torques</i> , <i>Clostridium scindens</i> , <i>C. nexile</i> and <i>C. fusiformis</i> (all from human gut) plus over fifty uncultured bacteria including <i>Eubacterium</i> spp., butyrate-producing bacteria, <i>Ruminococcus</i> spp. (all from human gut) and other strains from the human, pig and chicken GI tracts. 1 nt difference (in the middle of the probe) to many uncultured bacteria from gut sources. | This study                   |                                                                                                        |
| <i>R. obeum</i> <sup>#</sup>               | 50.0 | 20 | CTCCTTCTTTGCAGTTAGGT    | <i>Ruminococcus obeum</i> and thirteen uncultured bacteria from pig, human and soil samples. 3 nt difference to the next most similar bacterial sequence which included <i>Escherichia coli</i> and <i>Shigella flexneri</i> .                                                                                                                                                                                                                            | Wang <i>et al.</i> (1997)    | The 3' T was removed from the probe to bring the NN temperature to within the range of the microarray. |

|                                      |       |    |                       |                                                                                                                                                                                                                                                                                                                                                                                                                                |                                            |  |
|--------------------------------------|-------|----|-----------------------|--------------------------------------------------------------------------------------------------------------------------------------------------------------------------------------------------------------------------------------------------------------------------------------------------------------------------------------------------------------------------------------------------------------------------------|--------------------------------------------|--|
| <i>R. torques</i>                    | 50.1  | 20 | GGATGAAGAGGATTGTGACT  | <i>Ruminococcus torques</i> , an uncultured <i>Ruminococcus</i> spp. and an uncultured clone from an elderly human. 1 nt difference to a butyrate producing bacteria from the human gut. 3 nt divergence to all remaining sequences which were eukaryotic.                                                                                                                                                                     | This study                                 |  |
| Rumin-Eubac-Clost cluster            | 49-49 | 19 | GCTTCTTAGTCARGTACCG   | <i>Ruminococcus-Eubacterium-Clostridium</i> cluster                                                                                                                                                                                                                                                                                                                                                                            | Franks <i>et al.</i> (1998)                |  |
| <i>Salmonella</i> genus <sup>#</sup> | 49.0  | 20 | TGCGGTTATTAACCACAACA  | <i>Salmonella</i> general probe. Also specific for <i>Enterobacter cloacae</i> , <i>Leclercia adecarboxylata</i> , <i>Citrobacter</i> spp.. 1 nt difference to approximately twenty other bacteria ( <i>Salmonella</i> spp., <i>Citrobacter</i> , <i>Enterobacter</i> spp.or uncultured bacteria). 2 nt difference to many other bacteria including <i>E. coli</i> and many uncultured bacteria                                | Netherwood <i>et al.</i> (1999)            |  |
| <i>S. enteritidis</i>                | 50.1  | 20 | CATCCACAGAAGAATCCAGA  | <i>Salmonella enteritidis</i> , <i>Salmonella</i> Typhimurium LT2 and <i>Enterobacter agglomerans</i> . 4 nt difference to the next nearest prokaryotic sequence which was <i>Enterococcus faecalis</i> .                                                                                                                                                                                                                      | This study                                 |  |
| <i>S. maxima</i>                     | 49.0  | 21 | CCGCATAACATTATTGAAAGG | <i>Sarcina maxima</i> and an uncultured bacterium from manure wash off. 1 nt difference to <i>S. ventriculi</i> and three uncultured bacteria (only one from gut source(a rat)). 4 nt and 5 nt difference to all further sequences which were eukaryotic.                                                                                                                                                                      | This study                                 |  |
| <i>S. ruminantium</i> 1              | 49.9  | 20 | AGATGCGAATAGTTTCTTGC  | <i>Selenomonas ruminantium</i> and twelve other uncultured rumen bacteria. 2 nt difference to two uncultured rumen bacteria. 4 nt difference to all other bacteria.                                                                                                                                                                                                                                                            | This study                                 |  |
| <i>S. ruminantium</i> 2              | 45.0  | 18 | TGCTAATACCGAATGTTG    | <i>Selenomonas ruminatum</i> , <i>Mitsuokella multiacida</i> , <i>Selenomonas lactificex</i> , <i>Pectinatus frisingensis</i> , <i>Pectinatus cerevisiiphilus</i> , <i>Anaerovibrio glycerini</i> , <i>Anaeroarcus burkinens</i> , <i>Propionispira arboris</i> and many uncultured rumen and swine bacteria. Fifteen mostly uncultured bacteria with 1 nt difference and all remaining sequences had 2 nt difference or more. | K. Tajima <i>et al.</i> (2001)             |  |
| <i>S. sphaeroides</i>                | 49.7  | 19 | GCGTGTAGGTGGATTCTTA   | <i>Sporomusa sphaeroides</i> , <i>Sporomusa paucivorans</i> and a <i>Sporomusa</i> spp.. 1 nt difference to two <i>Sporomusa</i> spp.. 4 nt difference to any other similar sequences.                                                                                                                                                                                                                                         | This study                                 |  |
| <i>Streptococcus</i> genus           | 51.0  | 18 | CACTCTCCCCTTCTGCAC    | A huge variety of Streptococci. 2 nt difference to all remaining sequences which were eukaryotic.                                                                                                                                                                                                                                                                                                                              | Trebesius <i>et al.</i> (2000) (probeBase) |  |
| <i>S. bovis</i>                      | 49.0  | 20 | CTAATACCGCATAACAGCAT  | <i>Streptococcus bovis</i> , <i>S. equinus</i> (sub-family of <i>S. bovis</i> ), <i>S. luteciae</i> and <i>S. infantarius</i> . 1 nt difference to <i>S. gallinaceus</i> and two other unknown bacteria. All remaining sequences had at least 2 nt divergence.                                                                                                                                                                 | Tajima <i>et al.</i> (2001)                |  |

|                                 |      |    |                      |                                                                                                                                                                                                                                                                                                                                                                                                                            |            |                                     |
|---------------------------------|------|----|----------------------|----------------------------------------------------------------------------------------------------------------------------------------------------------------------------------------------------------------------------------------------------------------------------------------------------------------------------------------------------------------------------------------------------------------------------|------------|-------------------------------------|
| <i>S. lactis</i> 1              | 49.9 | 20 | ACGATGAGTGCTAGATGTAG | <i>Lactococcus/Streptococcus lactis</i> , <i>S. cremoris</i> and twenty-five unknown bacteria including some isolated from a Crohn's disease patient's bacterial community. 1 nt difference to three strains ( <i>L. lactis</i> and two unknown bacteria). 2 nt difference to many sequences which included a large number uncultured bacteria (all non-gut bacteria), <i>Weissella</i> spp. and <i>Lactobacillus</i> spp. | This study |                                     |
| <i>S. lactis</i> 2              | 50.1 | 20 | GACATACTCGTGCTATTCCT | <i>Lactococcus lactis</i> and ten unidentified prokaryotes which includes some isolated from human faeces and swine pit manure. 1 nt difference to <i>L. garvieae</i> (also known as <i>Enterococcus seriolicida</i> ). 5 nt difference to all remaining prokaryotic sequences.                                                                                                                                            | This study |                                     |
| <i>S. oralis</i>                | 50.0 | 19 | AAGAACGAGTGTGAGAGTG  | <i>Streptococcus oralis</i> , <i>S. cristatus</i> , <i>S. peroris</i> , <i>S. parasanguis</i> , <i>S. pneumoniae</i> , <i>S. mitis</i> , <i>S. australis</i> , <i>S. salivarius</i> , over seventy-five unidentified human oral bacteria, <i>S. vestibularis</i> , <i>S. sanguinis</i> and many further uncultured bacteria. 3 nt difference to many other <i>Streptococcus</i> spp.                                       | This study |                                     |
| <i>S. thermophilus</i>          | 50.0 | 18 | CTACAAGATGGACCTGCG   | <i>Streptococcus thermophilus</i> , <i>S. salivarius</i> , <i>S. vestibularis</i> , <i>Lactobacillus casei</i> , <i>S. mitis</i> , and fifty-six uncultured bacteria. 2 nt and 3 nt difference to all remaining similar sequences were eukaryotic.                                                                                                                                                                         | This study |                                     |
| <i>T. aceticus</i> 1            | 50.0 | 18 | GGACGACAACTGACTCTG   | <i>Termitobacter aceticus</i> . 3 nt difference to <i>Vibrio cholerae</i> , <i>Neurospora crassa</i> and one eukaryotic sequence.                                                                                                                                                                                                                                                                                          | This study |                                     |
| <i>T. aceticus</i> 2            | 50.1 | 19 | TCGCTGATTGTCTTAGTGG  | <i>Termitobacter aceticus</i> . 2 nt difference to a single prokaryote and remaining bacterial sequence similarities had 3 nt difference or more.                                                                                                                                                                                                                                                                          | This study |                                     |
| <i>Thermus thermophilus</i>     | 50.1 | 17 | TACGCTCAGGCTAGACG    | <i>Thermus thermophilus</i> , <i>T. aquaticus</i> , <i>T. fiji</i> , <i>T. igniterrae</i> and <i>T. Brockianus</i> . 1 nt difference to an uncultured <i>Eubacterium</i> spp. and 2 nt to all remaining sequences which were <i>Thermus</i> spp.                                                                                                                                                                           | This study | Not ordered for expanded microarray |
| Thermus thermoph 1 <sup>#</sup> | 49.0 | 16 | GGTGTGTCCAAAGGGC     | <i>Thermus thermophilus</i> and <i>Rhodochaete parvula</i> . 1 nt difference to eukaryotic sequences only.                                                                                                                                                                                                                                                                                                                 | This study |                                     |
| Thermus thermoph 2 <sup>#</sup> | 49.9 | 18 | GGGAAACTCGGGCTAATC   | <i>Thermus thermophilus</i> and many other thermophilic bacteria all from extreme environments. 1 nt difference to grassland soil clones and many gammaproteobacteria. 2 nt difference to further uncultured soil bacteria.                                                                                                                                                                                                | This study |                                     |
| Thermus thermoph 3 <sup>#</sup> | 51.4 | 16 | CGGGTGAAAGCCTGGG     | <i>Thermus thermophilus</i> and <i>T. fiji</i> . 1 nt difference to <i>Thermus</i> spp., <i>Rhodobacter</i> spp. or eukaryotic sequences.                                                                                                                                                                                                                                                                                  | This study |                                     |

|                          |                                          |    |                     |                                                                                                                                                                                                                                                                                                                                                                                                                            |                                          |                                                                               |
|--------------------------|------------------------------------------|----|---------------------|----------------------------------------------------------------------------------------------------------------------------------------------------------------------------------------------------------------------------------------------------------------------------------------------------------------------------------------------------------------------------------------------------------------------------|------------------------------------------|-------------------------------------------------------------------------------|
| Universal1               | 54 (ProbeBase described NN temp as 55°C) | 18 | GCTGCCTCCCGTAGGAGT  | Specificity to a huge and diverse range of bacteria.                                                                                                                                                                                                                                                                                                                                                                       | Amann <i>et al.</i> (1990) (probeBase)   | 90.4% total coverage. Probe ordered for initial preliminary array experiments |
| Universal2               | 52.0                                     | 18 | TTGTACACACCGCCCGTC  | Specificity to a huge and diverse range of bacteria.                                                                                                                                                                                                                                                                                                                                                                       | Seksik <i>et al.</i> (2003)              |                                                                               |
| <i>V. fluvialis</i>      | 50.4                                     | 18 | CTACCAAGACCGTGATGC  | <i>Vagococcus fluvialis</i> , four <i>Vagococcus</i> spp. and a single uncultured <i>Enterococcus</i> spp. from a chicken GI tract. 2 nt difference to many other <i>Lactobacillus</i> spp..                                                                                                                                                                                                                               | This study                               |                                                                               |
| <i>Veillonella</i> genus | 51.0                                     | 18 | AGACGCAATCCCCTCCTT  | <i>Veillonella dispar</i> , <i>V. parvula</i> , <i>V. atypica</i> , <i>V. caviae</i> , eighteen uncultured bacteria from the mouth, eight from infant faeces and four bacteria from an unknown source. 1 nt difference to thirteen uncultured bacteria from a lake and five <i>Veillonella</i> spp. 3 nt difference to all remaining sequences.                                                                            | Harmsen <i>et al.</i> (2002) (probeBase) |                                                                               |
| Verrucomicrobiales       | 54 (ProbeBase described NN temp as 55°C) | 18 | GCTGCCACCCGTAGGTGT  |                                                                                                                                                                                                                                                                                                                                                                                                                            | Daims <i>et al.</i> (1999) (probeBase)   | 70% total coverage                                                            |
| <i>V. spinosum</i> 1     | 47.8                                     | 16 | GAGCAATCCGAGCACT    | <i>Verrucomicrobium spinosum</i> and one uncultured bacteria from soil. 1 nt difference to a single <i>Pseudomonas putida</i> from an unknown source.                                                                                                                                                                                                                                                                      | This study                               |                                                                               |
| <i>V. spinosum</i> 2     | 50.1                                     | 17 | CCTCATGTGGTCGCAAG   | <i>Verrucomicrobium spinosum</i> . 1 nt difference to three uncultured <i>Verrucomicrobium</i> spp.. 2 nt difference from <i>Bacillus cereus</i> from an unknown source.                                                                                                                                                                                                                                                   | This study                               |                                                                               |
| <i>V. spinosum</i> 3     | 50.1                                     | 18 | CAACCTGTCGCTTTCTGA  | <i>Verrucomicrobium spinosum</i> . 1 nt difference to eukaryotic sequences and no further prokaryotic sequences.                                                                                                                                                                                                                                                                                                           | This study                               |                                                                               |
| <i>V. spinosum</i> 4     | 50.2                                     | 17 | AGCGAGGAATAGCCCAG   | <i>Verrucomicrobium spinosum</i> . 2 nt difference to eukaryotic sequences, no further prokaryotic sequences.                                                                                                                                                                                                                                                                                                              | This study                               |                                                                               |
| <i>V. spinosum</i> 5     | 50.9                                     | 16 | ACCGCAAGGAGGCAAG    | <i>Verrucomicrobium spinosum</i> . The following organisms whose 16S ribosomal gene sequence matched this probe were all isolated from mud samples: <i>Desulfovibrio giganteus</i> , two uncultured <i>Eubacterium</i> spp., and three uncultured bacteria from the soil. All other sequences had 3 nt difference to this probe: <i>Thermus aquaticus</i> , <i>Desulfotomaculum reducens</i> and <i>Brucella abortus</i> . | This study                               |                                                                               |
| <i>W. kandleri</i> 1     | 44.4                                     | 18 | TGAAATGAGATGAGAAGC  | <i>Weissella kandleri</i> . 2 nt difference to one strain of <i>Lactobacillus kandleri</i>                                                                                                                                                                                                                                                                                                                                 | This study                               |                                                                               |
| <i>W. kandleri</i> 2     | 49.9                                     | 19 | GCTTCAAGTCAAATGCCAA | <i>Weissella (Lactobacillus) kandleri</i> . 3 nt difference to another <i>L. kandleri</i> . 4 nt difference to <i>Bacillus anthracis</i> .                                                                                                                                                                                                                                                                                 | This study                               |                                                                               |

|                                                                                                                                                                                                                                                                                   |      |    |                         |                                                                                                                                                                                                                                                                                                                                                                                                                                |                         |                                                                                                                                  |
|-----------------------------------------------------------------------------------------------------------------------------------------------------------------------------------------------------------------------------------------------------------------------------------|------|----|-------------------------|--------------------------------------------------------------------------------------------------------------------------------------------------------------------------------------------------------------------------------------------------------------------------------------------------------------------------------------------------------------------------------------------------------------------------------|-------------------------|----------------------------------------------------------------------------------------------------------------------------------|
| <i>Yersinia</i> sp1                                                                                                                                                                                                                                                               | 51.0 | 18 | GGCAGCGGGAAGTAGTTT      | <i>Yersinia rohdei</i> , <i>Y. pestis</i> , <i>Y. kristensenii</i> , <i>Y. intermedia</i> , <i>Y. enterocolitica</i> , <i>Y. bercovieri</i> , <i>Y. aldovae</i> , <i>Y. pseudotuberculosis</i> , <i>Y. frederiksenii</i> and <i>Y. mollaretii</i> . 3 nt difference to the next most similar sequence which included <i>Enterobacter</i> spp. and <i>Neisseria gonorrhoeae</i> . 4 nt difference to further bacterial strains. | Sen (2000)              | The 5' C was removed from the beginning of this probe to bring it into temperature range required for the microarray.            |
| <i>Yersinia</i> sp2                                                                                                                                                                                                                                                               | 54.0 | 18 | CGGCAGCGGGAAGTAGTT      | <i>Yersinia rohdei</i> and <i>Yersinia pestis</i> . 1 nt difference to an <i>Enterobacter</i> spp.. 2 nt difference to many other strains but all were isolated from non-gut sources.                                                                                                                                                                                                                                          | Lu <i>et al.</i> (2003) | The 5' nucleotide was removed to bring the NN temperature closer to the temperature required range required for the microarray.  |
| Negative control1 <sup>#</sup>                                                                                                                                                                                                                                                    | 50.0 | 20 | AGTCAGTCAGTCAGTCAGTC    | No sequence matches                                                                                                                                                                                                                                                                                                                                                                                                            | This study              |                                                                                                                                  |
| Negative control2 <sup>#</sup>                                                                                                                                                                                                                                                    | 50.0 | 20 | AAGGTTCCAAGGTTCCAAGG    | No sequence matches                                                                                                                                                                                                                                                                                                                                                                                                            | This study              |                                                                                                                                  |
| Negative control3 <sup>#</sup>                                                                                                                                                                                                                                                    | 50.0 | 20 | GGAAACCCTTTGGGAAACCC    | No sequence matches                                                                                                                                                                                                                                                                                                                                                                                                            | This study              |                                                                                                                                  |
| Negative control4 <sup>#</sup>                                                                                                                                                                                                                                                    | 55.0 | 20 | GGAAACCTGTAGCCCTTTCC    | No sequence matches                                                                                                                                                                                                                                                                                                                                                                                                            | This study              |                                                                                                                                  |
| Negative control5 <sup>#</sup>                                                                                                                                                                                                                                                    | 52.0 | 23 | GGGTTTCACAAGGTAAGAATGTG | No sequence matches                                                                                                                                                                                                                                                                                                                                                                                                            | This study              |                                                                                                                                  |
| BLON135a-Perfect match probe with 0 nt difference to the <i>Bifidobacterium longum</i> 16S ribosomal gene. Probes for melting curves. Note: these probes were not specific. They were used to test at what temp the probes dissociate from the product bound. <sup>#</sup>        | 51.0 | 19 | GCCCCATACACCGGAATAG     | <i>Bifidobacterium longum</i> , <i>B. infantis</i> and <i>B. adolescentis</i>                                                                                                                                                                                                                                                                                                                                                  | This study              | Ideally all temperatures should have been the same so comparison of melting temps with different mis-matches can be undertaken.  |
| BLONG135b-Probe with a 1 nt difference to the <i>Bifidobacterium longum</i> 16S ribosomal gene. Probes for melting curves. Note: these probes were not specific. They were used to test at what temp the probes dissociate from the product bound. <sup>#</sup>                   | 53.0 | 19 | GCCCCATGCACCGGAATAG     | <i>Bifidobacterium animalis</i>                                                                                                                                                                                                                                                                                                                                                                                                | This study              | Ideally all temperatures should have been the same so comparison of melting temps with different mis-matches can be undertaken.  |
| BLONG135c-Probe with a 2 nt difference difference to the <i>Bifidobacterium longum</i> 16S ribosomal gene. Probes for melting curves. Note: these probes are not specific but they are there just to test at what temp the probes dissociate from the product bound. <sup>#</sup> | 54.0 | 19 | GCCCCAGACTCCGGAATAG     | <i>Bifidobacterium bifidum</i>                                                                                                                                                                                                                                                                                                                                                                                                 | This study              | Ideally all temperatures should have been the same so comparison of melting temps with different miss matches can be undertaken. |

\* = All probe sequences (5'-3') have a 15 nt dTTP spacer at the 5' end. The 5'-terminal dTTP was aminated to allow chemical coupling to the microarray slide.

<sup>#</sup> = Probes tested for specificity as described in Table 3.

Pink text indicates probes which fall outside the temperature range of the microarray (48°C-52°C), but were still added to the expanded microarray.

NN refers to the nearest neighbour temperature which describes all the relevant interactions of all the atoms in a DNA duplex structure.

The NN method was used to calculate the predicted melting temperature of a primer according to the sum of the nearest neighbour interactions of all the nucleotides.

Description refers to the predicted bacterial species which will bind to the probe using BLASTn software at the NCBI website.

Nucleotide code: Wobble nucleotides in the probes refer to: Y = C or T; D = A, G or T; R = A or G; K = G or T; W = A or T; S = C or G.
