# Supplementary material for: A short-oligonucleotide microarray that allows improved detection of gastrointestinal tract microbial communities
Source: PubMed Central journal article supplement (PMC2628385; doi:10.1186/1471-2180-8-195), 2008-11-11
Supplement: 1471-2180-8-195-S5.pdf [file 1471-2180-8-195-S5.pdf]

**Additional file 5 - Complete set of normalised data values from three healthy individuals (A, B and C) and an Ulcerative Colitis patient in active disease and remission states**

| <b>Probe name</b>         | <b>Individual A</b> | <b>Individual B</b> | <b>Individual C</b> | <b>Disease</b> | <b>Remission</b> |
|---------------------------|---------------------|---------------------|---------------------|----------------|------------------|
| Acidobacteria1            | 1.09                | 0.36                | 0.50                | 0.15           | 0.28             |
| Acidobacteria2            | 0.05                | 0.02                | 0.04                | 0.02           | 0.04             |
| Alphaproteobacteria       | 0.87                | 0.16                | 0.22                | 0.09           | 0.11             |
| Alpha-Deltaproteobacteria | 1.79                | 0.69                | 0.27                | 0.00           | 0.00             |

| <b>Probe name</b>             | <b>Individual A</b> | <b>Individual B</b> | <b>Individual C</b> | <b>Disease</b> | <b>Remission</b> |
|-------------------------------|---------------------|---------------------|---------------------|----------------|------------------|
| B.thetaiotaomicron & B.ovatus | 12.09               | 3.88                | 20.53               | 0.56           | 4.08             |
| B.ovatus                      | 0.60                | 0.17                | 0.96                | 0.03           | 0.28             |
| B.thetaiotaomicron            | 1.86                | 0.55                | 2.52                | 0.01           | 0.01             |
| B.vulgatus1                   | 8.10                | 2.90                | 3.22                | 0.67           | 6.13             |
| B.vulgatus2                   | 0.37                | 0.36                | 0.13                | 0.00           | 0.03             |
| B.putredinis1                 | 13.01               | 0.34                | 0.82                | 0.38           | 1.51             |
| B.putredinis2                 | 3.80                | 0.44                | 0.38                | 0.07           | 0.38             |
| B.putredinis3                 | 0.47                | 0.06                | 0.18                | 0.01           | 0.09             |
| B.putredinis4                 | 2.45                | 0.24                | 0.73                | 0.13           | 0.51             |
| B.distasonis1*                | 0.23                | 0.18                | 0.23                | 0.00           | 0.02             |
| B.distasonis2*                | 2.84                | 0.70                | 3.41                | 0.08           | 1.09             |
| B.fragilis grp*               | 5.20                | 1.37                | 6.46                | 0.10           | 1.54             |
| B.alcalophilus                | 0.00                | 0.01                | 0.01                | 0.00           | 0.00             |
| B.merdae                      | 1.45                | 0.09                | 0.35                | 0.05           | 0.49             |
| B.splanchnicus                | 0.00                | 0.00                | 0.00                | 0.00           | 0.00             |
| B.stercoris                   | 0.41                | 0.26                | 0.12                | 0.00           | 0.00             |

| <b>Probe name</b>            | <b>Individual A</b> | <b>Individual B</b> | <b>Individual C</b> | <b>Disease</b> | <b>Remission</b> |
|------------------------------|---------------------|---------------------|---------------------|----------------|------------------|
| P.enoecca1                   | 0.00                | 0.00                | 0.00                | 0.00           | 0.00             |
| P.enoecca2                   | 1.35                | 0.21                | 1.09                | 0.02           | 0.53             |
| F.canadensis1                | 0.26                | 0.06                | 0.11                | 0.04           | 0.17             |
| F.canadensis2                | 5.19                | 0.64                | 1.20                | 0.56           | 0.76             |
| Cytophaga-Flavobacterium grp | 8.95                | 1.90                | 7.17                | 0.92           | 2.36             |
| Cytophaga-Bacteroidetes1     | 16.39               | 2.84                | 7.51                | 0.41           | 2.84             |
| Cytophaga-Bacteroidetes2     | 0.00                | 0.00                | 0.03                | 0.00           | 0.00             |
| Cytophaga-Bacteroidetes3     | 0.24                | 0.04                | 0.12                | 0.00           | 0.03             |
| F.candensis1                 | 0.26                | 0.06                | 0.11                | 0.04           | 0.17             |
| F.candensis2                 | 5.19                | 0.64                | 1.20                | 0.56           | 0.76             |

| <b>Probe name</b>       | <b>Individual A</b> | <b>Individual B</b> | <b>Individual C</b> | <b>Disease</b> | <b>Remission</b> |
|-------------------------|---------------------|---------------------|---------------------|----------------|------------------|
| B.longum grp1*          | 2.87                | 0.79                | 0.42                | 5.41           | 2.89             |
| B.longum grp2*          | 3.18                | 0.38                | 0.22                | 2.99           | 1.54             |
| B.longum grp3*          | 7.46                | 1.51                | 0.97                | 9.18           | 5.17             |
| B.bifidum*              | 5.20                | 0.21                | 0.63                | 0.15           | 0.28             |
| B.longum grp & B.breve* | 0.10                | 0.05                | 0.18                | 0.00           | 0.00             |
| B.pseud & catenulatum*  | 0.03                | 0.01                | 0.05                | 0.08           | 0.02             |
| B.adolescentis*         | 0.02                | 0.00                | 0.03                | 0.07           | 0.11             |
| B.angulatum*            | 0.00                | 0.00                | 0.00                | 0.00           | 0.00             |
| B.crossotus             | 3.64                | 1.04                | 0.73                | 0.02           | 0.01             |

| <b>Probe name</b>  | <b>Individual A</b> | <b>Individual B</b> | <b>Individual C</b> | <b>Disease</b> | <b>Remission</b> |
|--------------------|---------------------|---------------------|---------------------|----------------|------------------|
| CclusterXIVab*     | 13.51               | 3.18                | 6.03                | 1.94           | 1.23             |
| C.coccoides        | 23.87               | 6.26                | 12.60               | 3.24           | 1.52             |
| C.clostridiformes1 | 3.52                | 0.74                | 1.18                | 0.83           | 1.42             |
| C.clostridiformes2 | 0.00                | 0.00                | 0.00                | 0.00           | 0.00             |

|                    |       |      |       |      |      |
|--------------------|-------|------|-------|------|------|
| C.symbiosum        | 0.28  | 0.22 | 0.15  | 0.00 | 0.00 |
| CclusterIV         | 1.31  | 0.34 | 0.35  | 0.11 | 0.07 |
| C.leptum grp*      | 15.58 | 5.42 | 11.09 | 4.07 | 3.08 |
| C.leptum 1*        | 0.05  | 0.04 | 0.10  | 0.21 | 0.03 |
| C.leptum 2*        | 0.14  | 0.10 | 0.54  | 0.75 | 0.19 |
| C.leptum sub-group | 4.36  | 1.66 | 1.84  | 1.94 | 1.00 |
| CclusterI          | 21.79 | 3.36 | 4.84  | 0.23 | 0.25 |
| C.butyricum        | 0.24  | 0.31 | 0.11  | 0.00 | 0.00 |
| C.nexile           | 0.53  | 0.11 | 0.19  | 0.10 | 0.03 |
| C.paraputrificum   | 0.48  | 0.04 | 0.14  | 0.02 | 0.02 |

| Probe name  | Individual A | Individual B | Individual C | Disease | Remission |
|-------------|--------------|--------------|--------------|---------|-----------|
| CclusterIII | 13.09        | 5.11         | 2.27         | 1.27    | 0.34      |
| C.difficile | 4.77         | 0.73         | 0.93         | 0.26    | 0.33      |
| C.eutactus1 | 0.05         | 0.10         | 0.05         | 0.00    | 0.00      |
| C.eutactus2 | 2.12         | 1.88         | 1.29         | 0.01    | 0.08      |
| D.piger1    | 0.00         | 0.02         | 0.07         | 0.00    | 0.00      |
| D.piger2    | 0.02         | 0.01         | 0.07         | 0.05    | 0.16      |
| D.piger3    | 0.00         | 0.10         | 0.04         | 0.00    | 0.01      |
| D.piger4    | 0.02         | 0.05         | 0.09         | 0.41    | 1.12      |

| Probe name            | Individual A | Individual B | Individual C | Disease | Remission |
|-----------------------|--------------|--------------|--------------|---------|-----------|
| E.coli O157           | 0.01         | 0.02         | 0.08         | 0.00    | 0.02      |
| E.coli                | 0.00         | 0.00         | 0.00         | 0.00    | 0.00      |
| Enterobacteriaceae1*  | 3.45         | 8.39         | 5.02         | 1.62    | 0.29      |
| Enterobacteriaceae2   | 0.07         | 0.67         | 0.46         | 0.03    | 0.01      |
| E.rectale1            | 1.88         | 0.12         | 0.51         | 1.43    | 0.20      |
| E.rectale2            | 4.46         | 0.36         | 1.00         | 2.16    | 0.50      |
| E.hallii              | 0.83         | 0.15         | 0.27         | 0.07    | 0.06      |
| EhalliiCherbivoransp  | 0.00         | 0.00         | 0.01         | 0.01    | 0.00      |
| E.ventriosum          | 3.72         | 1.55         | 1.55         | 0.19    | 0.15      |
| E.formicigenerans     | 3.39         | 0.64         | 0.54         | 1.10    | 0.75      |
| E.siraeum             | 0.86         | 0.11         | 0.15         | 0.20    | 0.10      |
| E.biforme1            | 0.09         | 0.08         | 0.07         | 0.23    | 0.06      |
| E.biforme2            | 0.15         | 0.08         | 0.07         | 0.13    | 0.02      |
| E.biforme3            | 0.26         | 0.74         | 0.21         | 1.74    | 0.12      |
| E.biforme4            | 0.42         | 0.38         | 0.20         | 0.65    | 0.15      |
| E.cylindroides1       | 2.25         | 0.37         | 0.16         | 0.00    | 0.01      |
| E.cylindroides2       | 0.00         | 0.00         | 0.00         | 0.02    | 0.00      |
| E.cylindroides clust1 | 12.73        | 3.14         | 3.81         | 0.86    | 0.17      |
| E.cylindroides clust2 | 20.44        | 4.34         | 4.83         | 2.66    | 0.35      |
| F.prausnitzii         | 0.27         | 0.37         | 0.63         | 0.18    | 0.25      |
| H.pylori              | 0.00         | 0.00         | 0.02         | 0.02    | 0.00      |

| Probe name          | Individual A | Individual B | Individual C | Disease | Remission |
|---------------------|--------------|--------------|--------------|---------|-----------|
| Firmicutes1*        | 0.03         | 0.00         | 0.01         | 0.00    | 0.00      |
| Firmicutes2*        | 1.37         | 0.09         | 0.12         | 0.25    | 0.06      |
| Firmicutes3*        | 0.02         | 0.00         | 0.00         | 0.00    | 0.00      |
| Enterococcus genus* | 0.02         | 0.00         | 0.01         | 0.00    | 0.00      |
| E.cecorum           | 0.59         | 0.11         | 0.15         | 0.11    | 0.13      |
| E.faecium*          | 0.00         | 0.00         | 0.02         | 0.00    | 0.00      |
| E.faecalis          | 0.03         | 0.01         | 0.04         | 0.02    | 0.02      |
| Lactobacilli        | 0.33         | 0.26         | 0.07         | 0.01    | 0.11      |
| L.brevis            | 0.22         | 0.11         | 0.06         | 0.31    | 0.32      |
| L.johnsonii*        | 0.00         | 0.00         | 0.01         | 0.00    | 0.00      |
| L.casei*            | 0.00         | 0.00         | 0.00         | 0.00    | 0.08      |

|                                |                     |                     |                     |                |                  |
|--------------------------------|---------------------|---------------------|---------------------|----------------|------------------|
| L.mucosae                      | 0.07                | 0.04                | 0.12                | 0.01           | 0.03             |
| <b>Probe name</b>              | <b>Individual A</b> | <b>Individual B</b> | <b>Individual C</b> | <b>Disease</b> | <b>Remission</b> |
| Rumin-Eubac-Clost cluster      | 7.39                | 2.50                | 4.26                | 1.59           | 0.80             |
| R.bromii                       | 10.07               | 1.11                | 2.98                | 0.00           | 0.00             |
| R.lactaris                     | 3.01                | 0.27                | 0.33                | 0.18           | 0.31             |
| R.torques                      | 1.02                | 0.01                | 0.01                | 0.00           | 0.00             |
| R.obeum*                       | 0.09                | 0.03                | 0.09                | 0.01           | 0.08             |
| R.cecicola                     | 1.57                | 0.87                | 3.22                | 0.44           | 0.20             |
| R.intestinalis1                | 0.76                | 0.40                | 0.57                | 0.03           | 0.05             |
| R.intestinalis2                | 0.10                | 0.05                | 0.11                | 0.00           | 0.01             |
| R. intestinalis sub-cluster    | 2.27                | 0.34                | 1.42                | 0.78           | 0.13             |
| R.albus                        | 0.46                | 0.13                | 0.37                | 0.02           | 0.03             |
| R.albus & R.flavefaciens1      | 1.43                | 0.77                | 0.38                | 0.05           | 0.03             |
| R.albus & R.flavefaciens2      | 10.63               | 3.07                | 1.71                | 1.22           | 0.25             |
| R.flavefaciens                 | 19.08               | 5.61                | 6.02                | 11.02          | 2.32             |
| R.callidus                     | 0.67                | 0.73                | 1.22                | 0.05           | 0.01             |
| Salmonella genus*              | 0.00                | 0.00                | 0.00                | 0.01           | 0.00             |
| <b>Probe name</b>              | <b>Individual A</b> | <b>Individual B</b> | <b>Individual C</b> | <b>Disease</b> | <b>Remission</b> |
| S.oralis                       | 2.92                | 0.18                | 0.28                | 0.27           | 0.22             |
| S.thermophilus                 | 3.75                | 0.22                | 0.19                | 0.40           | 0.12             |
| Streptococcus genus            | 3.15                | 0.31                | 0.36                | 0.92           | 0.29             |
| S.bovis                        | 0.09                | 0.05                | 0.14                | 0.04           | 0.04             |
| Verrucomicrobiales             | 1.60                | 8.57                | 7.81                | 0.01           | 0.05             |
| T.aceticus1                    | 0.75                | 0.18                | 0.18                | 0.17           | 0.03             |
| T.aceticus2                    | 0.04                | 0.00                | 0.01                | 0.00           | 0.00             |
| Veillonella genus              | 0.85                | 0.32                | 0.47                | 0.36           | 0.34             |
| <b>Probe name</b>              | <b>Individual A</b> | <b>Individual B</b> | <b>Individual C</b> | <b>Disease</b> | <b>Remission</b> |
| Negative control average 1*    | 0.05                | 0.01                | 0.02                | 0.03           | 0.02             |
| Negative control average 2*    | 0.00                | 0.00                | 0.00                | 0.00           | 0.00             |
| Negative control average 3*    | 0.01                | 0.00                | 0.01                | 0.00           | 0.01             |
| Negative control average 4*    | 0.00                | 0.01                | 0.02                | 0.00           | 0.00             |
| Negative control average 5*    | 0.00                | 0.00                | 0.02                | 0.00           | 0.00             |
| Thermus thermoph 1*            | 0.14                | 0.21                | 0.38                | 0.08           | 0.12             |
| Thermus thermoph 2*            | 0.84                | 1.07                | 1.00                | 1.06           | 1.04             |
| Thermus thermoph 3*            | 1.39                | 1.12                | 1.16                | 1.14           | 1.16             |
| <b>Probe name</b>              | <b>Individual A</b> | <b>Individual B</b> | <b>Individual C</b> | <b>Disease</b> | <b>Remission</b> |
| Bacteroides*                   | 48.33               | 9.49                | 54.52               | 1.81           | 12.18            |
| Cytophagales-Bacteroidales grp | 61.77               | 15.34               | 67.81               | 2.50           | 18.64            |
| Cytophaga-Bacteroidetes4       | 117.52              | 28.80               | 84.82               | 10.89          | 40.26            |
| Lactobacillales                | 41.37               | 21.16               | 8.95                | 5.69           | 5.56             |
| Universal1*                    | 117.54              | 28.95               | 46.90               | 10.97          | 12.19            |
| Universal2                     | 40.74               | 15.52               | 23.85               | 6.48           | 5.59             |
| <b>Probe name</b>              | <b>Individual A</b> | <b>Individual B</b> | <b>Individual C</b> | <b>Disease</b> | <b>Remission</b> |
| Negative control average 1*    | 0.01                | 0.00                | 0.00                | 0.00           | 0.00             |
| Negative control 1*            | 0.02                | 0.01                | 0.00                | 0.00           | 0.00             |
| Negative control 1*            | 0.07                | 0.00                | 0.02                | 0.03           | 0.01             |
| Negative control 1*            | 0.08                | 0.02                | 0.04                | 0.05           | 0.03             |
| Negative control 1*            | 0.10                | 0.03                | 0.06                | 0.08           | 0.06             |
| Negative control 2*            | 0.00                | 0.00                | 0.01                | 0.00           | 0.01             |
| Negative control 2*            | 0.00                | 0.00                | 0.02                | 0.00           | 0.00             |
| Negative control 2*            | 0.00                | 0.00                | 0.00                | 0.00           | 0.00             |

|                     |      |      |      |      |      |
|---------------------|------|------|------|------|------|
| Negative control 2* | 0.00 | 0.00 | 0.00 | 0.00 | 0.00 |
| Negative control 2* | 0.00 | 0.01 | 0.00 | 0.00 | 0.00 |
| Negative control 3* | 0.00 | 0.00 | 0.00 | 0.01 | 0.00 |
| Negative control 3* | 0.00 | 0.00 | 0.00 | 0.00 | 0.00 |
| Negative control 3* | 0.00 | 0.01 | 0.00 | 0.00 | 0.00 |
| Negative control 3* | 0.03 | 0.00 | 0.03 | 0.00 | 0.01 |
| Negative control 3* | 0.00 | 0.03 | 0.00 | 0.02 | 0.01 |
| Negative control 4* | 0.00 | 0.00 | 0.01 | 0.01 | 0.00 |
| Negative control 4* | 0.00 | 0.01 | 0.03 | 0.00 | 0.00 |
| Negative control 4* | 0.00 | 0.01 | 0.02 | 0.00 | 0.00 |
| Negative control 4* | 0.00 | 0.00 | 0.00 | 0.00 | 0.00 |
| Negative control 4* | 0.02 | 0.01 | 0.06 | 0.01 | 0.00 |
| Negative control 5* | 0.00 | 0.00 | 0.06 | 0.00 | 0.01 |
| Negative control 5* | 0.00 | 0.00 | 0.00 | 0.01 | 0.00 |
| Negative control 5* | 0.00 | 0.00 | 0.00 | 0.00 | 0.00 |
| Negative control 5* | 0.00 | 0.00 | 0.00 | 0.00 | 0.00 |
| Negative control 5* | 0.02 | 0.01 | 0.05 | 0.01 | 0.00 |

| <b>Probe name</b>   | <b>Individual A</b> | <b>Individual B</b> | <b>Individual C</b> | <b>Disease</b> | <b>Remission</b> |
|---------------------|---------------------|---------------------|---------------------|----------------|------------------|
| Thermus thermoph 1* | 0.14                | 0.21                | 0.38                | 0.08           | 0.12             |
| Thermus thermoph 2* | 0.75                | 1.26                | 1.23                | 0.91           | 1.09             |
| Thermus thermoph 2* | 0.83                | 1.06                | 0.86                | 0.88           | 0.82             |
| Thermus thermoph 2* | 0.69                | 0.94                | 1.13                | 0.81           | 0.92             |
| Thermus thermoph 2* | 1.17                | 1.42                | 1.36                | 1.41           | 1.24             |
| Thermus thermoph 2* | 1.00                | 1.31                | 1.15                | 1.81           | 1.65             |
| Thermus thermoph 2* | 0.90                | 1.22                | 1.00                | 1.81           | 1.60             |
| Thermus thermoph 2* | 0.87                | 1.14                | 0.96                | 1.06           | 1.05             |
| Thermus thermoph 2* | 0.90                | 1.17                | 1.06                | 1.29           | 1.20             |
| Thermus thermoph 2* | 0.65                | 0.67                | 0.67                | 0.34           | 0.47             |
| Thermus thermoph 2* | 0.58                | 0.55                | 0.58                | 0.31           | 0.38             |
| Thermus thermoph 3* | 0.79                | 0.72                | 0.65                | 0.43           | 0.53             |
| Thermus thermoph 3* | 1.09                | 0.84                | 0.81                | 0.59           | 0.82             |
| Thermus thermoph 3* | 1.30                | 1.25                | 1.29                | 1.30           | 1.49             |
| Thermus thermoph 3* | 1.84                | 1.53                | 1.37                | 1.08           | 1.12             |
| Thermus thermoph 3* | 1.95                | 1.27                | 1.63                | 2.39           | 1.96             |
| Thermus thermoph 3* | 1.69                | 1.42                | 1.45                | 1.74           | 1.70             |
| Thermus thermoph 3* | 1.64                | 1.30                | 1.29                | 1.27           | 1.29             |
| Thermus thermoph 3* | 1.56                | 1.26                | 1.26                | 1.20           | 1.18             |
| Thermus thermoph 3* | 0.66                | 0.48                | 0.66                | 0.28           | 0.37             |

\* = Probes tested in initial specificity testing

Any probe where a value below 0.09 was recorded, was considered as giving no signal.
